# Supplementary material for: A protective role for IL-13 receptor α 1 in bleomycin-induced pulmonary injury and repair
Source: PubMed Central journal article supplement — Mucosal Immunol. 2015 Jul 8;9(1):240–53. doi: 10.1038/mi.2015.56 (PMC4703942; doi:10.1038/mi.2015.56), 2015-07-08

## **A protective role for IL-13 receptor $\alpha$ 1 in bleomycin-induced pulmonary injury and repair**

Danielle Karo-Atar<sup>1</sup>, Amos Bordowitz<sup>1</sup>, Ori Wand<sup>1</sup>, Metsada Pasmanik-Chor<sup>2</sup>  
Isis E Fernandez<sup>3</sup>, Michal Itan<sup>1</sup>, Rachel Frenkel<sup>4</sup>, De'Broski R. Herbert<sup>5</sup>, Fred  
D. Finkelman<sup>6</sup>, Oliver Eickelberg<sup>3</sup>, Ariel Munitz<sup>1,\*</sup>

<sup>1</sup>Department of Clinical Microbiology and Immunology, The Sackler School of Medicine, The Tel-Aviv University, Ramat Aviv, 69978, Israel; <sup>2</sup>Bioinformatics Unit, George S. Wise Faculty of Life Sciences, Tel Aviv University, Tel Aviv, Israel; <sup>3</sup>Comprehensive Pneumology Center, Ludwig Maximilians University, University Hospital Grosshadern, and Helmholtz Zentrum München, Munich, Germany, Member of the German Center for Lung Research; <sup>4</sup>Department of Math Physics and Computer Science, University of Cincinnati, OH; <sup>5</sup>Division of Experimental Medicine, University of California, San Francisco, CA 94110, USA; <sup>6</sup>Division of Allergy, Immunology and Rheumatology, University of Cincinnati College of Medicine, Cincinnati, OH 45267; Department of Medicine, Cincinnati Veterans Affairs Medical Center, Cincinnati, OH 45220; and Division of Immunobiology, Cincinnati Children's Hospital Medical Center, Cincinnati, Ohio 45229, USA

**Running Title:** IL-13R $\alpha$ 1 in pulmonary fibrosis

\* Address correspondence to Ariel Munitz, PhD, Department of Clinical Microbiology and Immunology, The Sackler School of Medicine, The Tel-Aviv

University, Ramat Aviv, 69978, Israel, Tel (Office): +972-3-640- 7636,

Fax: +972-3-640-9160, [arielm@post.tau.ac.il](mailto:arielm@post.tau.ac.il)

**Author contributions:** D.K.A., A.B., O.W., I.E.F., K.H., M.I., O.E., and A.M. performed experiments; D.K.A., M.P.C, O.E., D.R.H and A.M. designed the experiments and analyzed the data; F.D.F. designed experiments and provided critical reagents; R.F. analyzed the data; D.K.A, R.F., O.E., D.R.H., F.D.F. and A.M. wrote the manuscript.

**Table S1:** A complete list of primers that were used in this study

| <b>Gene</b>       | <b>Species</b> | <b>Forward 3'→5'</b>        | <b>Reverse 3'→5'</b>       |
|-------------------|----------------|-----------------------------|----------------------------|
| <i>Hsc70</i>      | Human          | ttaccctgccccgattgaagaac     | tgtgtctgcttggtaggaatggtgga |
| <i>Il13ra1</i>    | Human          | ggcgacaacaagataaga          | tcattgtggaaggagaggt        |
| <i>Il13ra2</i>    | Human          | ccgaaacattggtagtga          | taggtcccaaaggatgct         |
| <i>Il4ra</i>      | Human          | tcttgccaggagcccacctgc       | ccctcaccctgcccctgtag       |
| <i>Hprt</i>       | Mouse          | gtaatgatcagtcaacgggggac     | ccagcaagcttgcaacctaacca    |
| <i>Il13ra1</i>    | Mouse          | ccttgcttctgtggtagttagag     | aaagggccaggaggaaatac       |
| <i>mf-Il13ra2</i> | Mouse          | ggactcatcagactataaaga       | gtgtgctccatttcattcta       |
| <i>Il4ra</i>      | Mouse          | ttagtgtcagtgtggtgcgctgta    | tctcagcctccaacaagtcggaaa   |
| <i>Clca3</i>      | Mouse          | tgaaattgtgctgctgaccgatgg    | tgtctgcaggcctcctgtcatttt   |
| <i>Retnla</i>     | Mouse          | ccctccactgtaacgaagactc      | cacaccagtagcagtcattcc      |
| <i>Chi3l4</i>     | Mouse          | gactcctggcttactttgagatt     | caaccactcattaccagatag      |
| <i>Agr2</i>       | Mouse          | ctgcttctgtggccatttc         | tggagagtgtctgaggtagtt      |
| <i>Tff2</i>       | Mouse          | tctggtagagggcgagaaa         | caaagcagcatccaagatcaaa     |
| <i>Timp1</i>      | Mouse          | ccagaaccgcagtgaagagtt       | aagctgcaggcactgatgtg       |
| <i>Mmp12</i>      | Mouse          | cgctctctgctgatgacatac       | gctaggttttgtcaaggatggg     |
| <i>Tgfb1</i>      | Mouse          | cggggagacctgggcaccatccatgac | ctgctccacctgggcttgcgaccac  |

**Figure S1. Lung epithelial cell gating strategy for sorting**

Gating and sorting strategy to obtain DAPI<sup>+</sup>CD45<sup>-</sup>/Podoplanin<sup>+</sup> cells of single-cell suspensions from enzymatically digested lungs of naïve wild type and *Il13ra1*<sup>-/-</sup> mice.

**Figure S2. Contribution of IL-4/IL-13 signaling to the bleomycin-induced transcriptional changes**

(A) Venn plot analyses of transcripts that are differentially expressed following bleomycin-, IL-13- or IL-4 treatment as observed from the lungs of wild type mice treated (A-B).

Figure S1

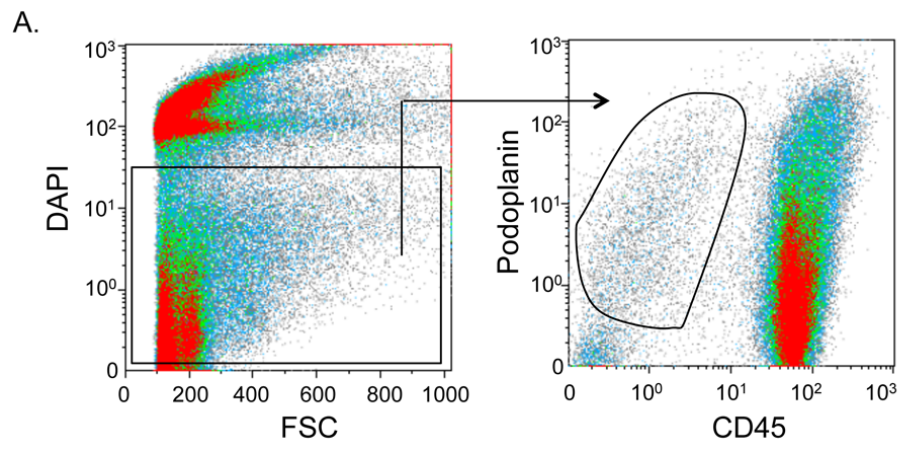

Figure S2

A.

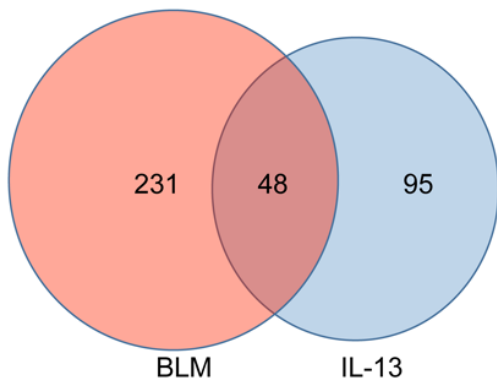

B.

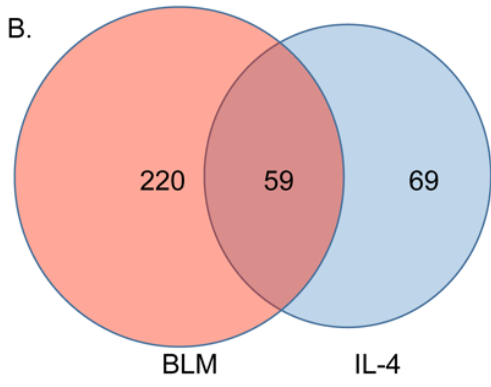

Supplement: mi201556x2.pdf [file mi201556x2.pdf]
