# Supplementary material for: A protective role for IL-13 receptor α 1 in bleomycin-induced pulmonary injury and repair
Source: PubMed Central journal article supplement — Mucosal Immunol. 2015 Jul 8;9(1):240–53. doi: 10.1038/mi.2015.56 (PMC4703942; doi:10.1038/mi.2015.56), 2015-07-08
Supplement: mi201556x1.pdf [file mi201556x1.pdf]

## Online Gene lists

### Transcript List 1

|               | Baseline                      |                      |
|---------------|-------------------------------|----------------------|
|               | <i>Il13ra1</i> <sup>-/-</sup> |                      |
| Gene symbol   | Fold change                   | Regulation direction |
| Clca3         | 17.28                         | down                 |
| Snca          | 6.51                          | up                   |
| Ucp1          | 3.29                          | up                   |
| Glycam1       | 2.68                          | up                   |
| Ly6i          | 2.58                          | down                 |
| Tff2          | 2.58                          | down                 |
| E430029J22Rik | 2.41                          | down                 |
| Retnla        | 2.37                          | down                 |
| Retnlg        | 2.22                          | down                 |
| Agr2          | 2.14                          | down                 |
| LOC672291     | 2.12                          | up                   |
| Chi3l4        | 2.11                          | down                 |
| S100a8        | 2.04                          | down                 |
| Pigr          | 2.04                          | down                 |

**Transcript list 2** (UC-unchanged) – WT specific differentially expressed transcripts (bleomycin-induced)

| Gene symbol                    | Wild type   |           | <i>Il13ra1</i> <sup>-/-</sup> |           |
|--------------------------------|-------------|-----------|-------------------------------|-----------|
|                                | Fold change | Direction | Fold change                   | Direction |
| V165-D-J-Cmu                   | 3.08        | up        | UC*                           | UC        |
| Gm10880                        | 2.26        | up        | UC                            | UC        |
| Slc19a2                        | 2.02        | up        | UC                            | UC        |
| Sesn2                          | 2.41        | up        | UC                            | UC        |
| Gdf15                          | 2.04        | up        | UC                            | UC        |
| 9030617O03Rik                  | 2.13        | up        | UC                            | UC        |
| Acp5                           | 2.10        | up        | UC                            | UC        |
| Igh-6                          | 2.10        | up        | UC                            | UC        |
| Ighg LOC100045391              | 2.85        | up        | UC                            | UC        |
| Igk-V1                         | 2.93        | up        | UC                            | UC        |
| Igk-V19-14                     | 4.93        | up        | UC                            | UC        |
| Igk-V28 Igkv12-46              | 4.61        | up        | UC                            | UC        |
| LOC100046496                   | 2.62        | up        | UC                            | UC        |
| LOC672291                      | 2.18        | up        | UC                            | UC        |
| Mgl2                           | 2.44        | up        | UC                            | UC        |
| Phlda3                         | 2.16        | up        | UC                            | UC        |
| Snord116                       | 2.48        | up        | UC                            | UC        |
| Snord116 Snord116l1 Snord116l2 | 2.47        | up        | UC                            | UC        |
| E430029J22Rik                  | 2.10        | down      | UC                            | UC        |
| Clca3                          | 4.41        | down      | UC                            | UC        |
| U46068                         | 2.65        | down      | UC                            | UC        |
| Ube2l6                         | 2.04        | down      | UC                            | UC        |
| Sox11                          | 2.18        | down      | UC                            | UC        |
| Slc4a1                         | 2.40        | down      | UC                            | UC        |
| Plunc                          | 2.02        | down      | UC                            | UC        |
| Gbp4                           | 2.27        | down      | UC                            | UC        |
| BC048546                       | 3.03        | down      | UC                            | UC        |
| Adh7                           | 2.00        | down      | UC                            | UC        |

**Transcript list 3** – Shared transcripts in bleomycin-treated WT and *Il13ra1*<sup>-/-</sup> mice

| Gene symbol     | Wild type   |           | <i>Il13ra1</i> <sup>-/-</sup> |           |
|-----------------|-------------|-----------|-------------------------------|-----------|
|                 | Fold change | Direction | Fold change                   | Direction |
| 2810417H13Rik   | 2.10        | up        | 2.69                          | up        |
| 4632434I11Rik   | 2.30        | up        | 2.30                          | up        |
| 9030625A04Rik   | 2.21        | up        | 2.66                          | up        |
| 9930013L23Rik   | 2.78        | up        | 4.90                          | up        |
| AA467197 Mir147 | 3.75        | up        | 7.00                          | up        |
| Adamts4         | 2.80        | up        | 3.12                          | up        |
| Akr1b8          | 2.23        | up        | 2.59                          | up        |
| Ankrd1          | 2.49        | up        | 3.06                          | up        |
| Anln            | 2.19        | up        | 3.01                          | up        |
| Aoah            | 2.70        | up        | 3.61                          | up        |
| Apobec1         | 2.13        | up        | 3.87                          | up        |
| Areg            | 2.23        | up        | 2.37                          | up        |
| Arg1            | 2.28        | up        | 7.10                          | up        |
| Asf1b           | 2.03        | up        | 2.27                          | up        |
| Aurkb           | 2.11        | up        | 2.60                          | up        |
| B4galt6         | 2.09        | up        | 2.42                          | up        |
| Bcl2a1a         | 2.08        | up        | 2.62                          | up        |
| Bcl2a1b         | 2.07        | up        | 2.62                          | up        |
| Bdkrb1          | 2.09        | up        | 2.12                          | up        |
| Bhlhe40         | 2.43        | up        | 2.60                          | up        |
| C1qa            | 3.31        | up        | 3.82                          | up        |
| C1qb            | 3.47        | up        | 3.48                          | up        |
| C1qc            | 3.94        | up        | 4.31                          | up        |
| C3ar1           | 5.89        | up        | 12.94                         | up        |
| Capg            | 2.06        | up        | 2.77                          | up        |
| Ccl17           | 3.07        | up        | 3.07                          | up        |
| Ccl2            | 4.68        | up        | 15.14                         | up        |
| Ccl3            | 3.84        | up        | 7.28                          | up        |
| Ccl7            | 4.00        | up        | 12.44                         | up        |
| Ccl8            | 2.43        | up        | 3.97                          | up        |
| Ccl9            | 3.33        | up        | 7.27                          | up        |
| Ccna2           | 2.72        | up        | 3.98                          | up        |
| Ccnb1           | 2.86        | up        | 3.70                          | up        |

|           |      |    |       |    |
|-----------|------|----|-------|----|
| Ccnb2     | 2.08 | up | 3.23  | up |
| Ccr1      | 2.47 | up | 4.46  | up |
| Ccr2      | 2.79 | up | 5.00  | up |
| Ccr5 Ccr2 | 3.88 | up | 7.15  | up |
| Cd68      | 2.01 | up | 2.74  | up |
| Cd72      | 3.13 | up | 3.72  | up |
| Cd80      | 2.49 | up | 3.46  | up |
| Cd84      | 2.01 | up | 3.14  | up |
| Cd86      | 2.17 | up | 2.71  | up |
| Cdk1      | 2.19 | up | 3.24  | up |
| Ch25h     | 3.19 | up | 5.16  | up |
| Chl1      | 7.07 | up | 6.61  | up |
| Chrna7    | 2.16 | up | 2.16  | up |
| Chsy3     | 2.29 | up | 2.16  | up |
| Clca1     | 2.66 | up | 3.52  | up |
| Clcn5     | 2.33 | up | 2.86  | up |
| Cldn4     | 5.05 | up | 5.03  | up |
| Clec12a   | 2.07 | up | 4.02  | up |
| Clec4a2   | 2.02 | up | 3.04  | up |
| Clec4n    | 4.09 | up | 5.58  | up |
| Clec5a    | 3.21 | up | 5.00  | up |
| Col1a1    | 2.06 | up | 3.32  | up |
| Col5a2    | 2.30 | up | 3.29  | up |
| Cpxm1     | 2.01 | up | 2.42  | up |
| Crct1     | 2.33 | up | 2.54  | up |
| Csf2rb    | 2.09 | up | 2.41  | up |
| Csf2rb2   | 2.10 | up | 2.36  | up |
| Ctps      | 2.19 | up | 2.38  | up |
| Ctss      | 2.53 | up | 3.18  | up |
| Cxcl10    | 3.85 | up | 11.35 | up |
| Cxcl13    | 4.66 | up | 3.64  | up |
| Cxcl9     | 2.87 | up | 4.88  | up |
| Cyp7b1    | 3.27 | up | 3.68  | up |
| Cyth4     | 2.30 | up | 2.85  | up |
| Dbc1      | 2.08 | up | 2.31  | up |
| Egr2      | 2.57 | up | 2.92  | up |
| Eln       | 2.34 | up | 3.33  | up |

|              |      |    |      |    |
|--------------|------|----|------|----|
| Emr1         | 2.17 | up | 3.28 | up |
| Enpp1        | 2.07 | up | 2.25 | up |
| Ereg         | 2.17 | up | 3.16 | up |
| Fcgr2b       | 2.93 | up | 3.61 | up |
| Fcgr3        | 2.56 | up | 3.35 | up |
| Fcrls        | 3.06 | up | 3.33 | up |
| Fn1          | 2.14 | up | 2.64 | up |
| Fscn1        | 2.33 | up | 2.83 | up |
| Fst Thrap3   | 3.91 | up | 6.48 | up |
| Gatm         | 2.91 | up | 4.71 | up |
| Gla          | 2.09 | up | 2.67 | up |
| Gm11428      | 3.05 | up | 6.61 | up |
| Gp49a        | 3.03 | up | 6.22 | up |
| Gpnmb        | 4.38 | up | 6.21 | up |
| Gpr171       | 2.73 | up | 2.16 | up |
| Hexb         | 2.05 | up | 2.63 | up |
| Hist1h1a     | 2.02 | up | 2.35 | up |
| Hist1h1b     | 2.16 | up | 2.30 | up |
| Hpgds        | 2.23 | up | 2.89 | up |
| Ifi204 Mnda  | 2.02 | up | 6.59 | up |
| Ifi205       | 2.40 | up | 3.64 | up |
| Igf1         | 2.18 | up | 3.19 | up |
| Il1rn        | 2.36 | up | 4.57 | up |
| Inhba        | 2.51 | up | 3.84 | up |
| Itgam        | 2.48 | up | 6.15 | up |
| Kif11        | 2.01 | up | 2.60 | up |
| Kif20a Cdc23 | 2.19 | up | 2.80 | up |
| Kmo          | 2.13 | up | 2.16 | up |
| Lgmn         | 2.11 | up | 2.58 | up |
| Lif          | 2.13 | up | 2.25 | up |
| Lilrb4       | 2.34 | up | 3.87 | up |
| Lox          | 2.90 | up | 3.39 | up |
| Lpcat2       | 2.00 | up | 2.82 | up |
| Ltbp2        | 2.88 | up | 3.07 | up |
| Ly86         | 2.25 | up | 3.11 | up |
| Mafb         | 2.48 | up | 4.29 | up |
| Malt1        | 2.07 | up | 2.20 | up |

|           |      |    |       |    |
|-----------|------|----|-------|----|
| Mest Cpg2 | 2.44 | up | 3.22  | up |
| Mki67     | 2.24 | up | 2.97  | up |
| Mmp12     | 7.21 | up | 11.53 | up |
| Mmp14     | 2.20 | up | 2.94  | up |
| Mmp19     | 2.34 | up | 3.51  | up |
| Mmp8      | 3.46 | up | 6.79  | up |
| Ms4a4a    | 2.02 | up | 5.33  | up |
| Ms4a6c    | 2.12 | up | 4.40  | up |
| Ms4a6d    | 3.90 | up | 8.06  | up |
| Ms4a7     | 3.49 | up | 5.13  | up |
| Msr1      | 4.94 | up | 9.03  | up |
| Mt1       | 2.30 | up | 2.57  | up |
| Mt2       | 2.43 | up | 2.28  | up |
| Myc       | 3.06 | up | 3.29  | up |
| Myo5a     | 2.11 | up | 2.56  | up |
| Npl       | 2.11 | up | 2.78  | up |
| Nrcam     | 3.08 | up | 3.62  | up |
| Orm1      | 2.41 | up | 2.07  | up |
| P2ry6     | 2.45 | up | 3.28  | up |
| P4ha3     | 4.03 | up | 5.44  | up |
| Pgf       | 2.12 | up | 3.19  | up |
| Pi15      | 2.03 | up | 3.15  | up |
| Pla1a     | 3.48 | up | 4.38  | up |
| Pla2g7    | 2.02 | up | 4.85  | up |
| Plau      | 3.22 | up | 4.67  | up |
| Pld4      | 2.00 | up | 2.51  | up |
| Plk1      | 2.40 | up | 2.90  | up |
| Prc1      | 2.27 | up | 3.30  | up |
| Prrg4     | 2.64 | up | 2.50  | up |
| Psrc1     | 2.27 | up | 2.30  | up |
| Ptafr     | 2.07 | up | 5.00  | up |
| Ptger4    | 2.44 | up | 2.75  | up |
| Rab3il1   | 2.11 | up | 2.81  | up |
| Rgs16     | 2.37 | up | 2.47  | up |
| Rrm2      | 2.41 | up | 2.87  | up |
| S100a4    | 2.60 | up | 4.00  | up |
| Saa3      | 4.68 | up | 13.47 | up |

|                         |      |    |       |    |
|-------------------------|------|----|-------|----|
| Selp                    | 2.22 | up | 4.28  | up |
| Serpina3f Serpina3g     | 2.48 | up | 3.16  | up |
| Serpina3m               | 3.05 | up | 3.64  | up |
| Serpina3n               | 2.64 | up | 2.94  | up |
| Serpinb9b               | 4.55 | up | 4.78  | up |
| Serpine1                | 3.11 | up | 4.90  | up |
| Serpine2                | 2.20 | up | 2.29  | up |
| Sfn                     | 2.89 | up | 2.70  | up |
| Sfrp1                   | 4.67 | up | 5.00  | up |
| Sh3pxd2b                | 2.32 | up | 2.44  | up |
| Slc11a1                 | 2.09 | up | 4.01  | up |
| Slc37a2                 | 2.03 | up | 2.97  | up |
| Slc39a14                | 2.95 | up | 3.22  | up |
| Slc7a11                 | 2.15 | up | 3.53  | up |
| Slc7a8                  | 2.82 | up | 4.67  | up |
| Socs3                   | 2.56 | up | 3.02  | up |
| Spp1                    | 5.21 | up | 5.82  | up |
| Sprr1a                  | 7.02 | up | 9.48  | up |
| Sprr2a1 Sprr2a2 Sprr2a3 | 2.33 | up | 2.12  | up |
| Spry4                   | 2.36 | up | 2.39  | up |
| Tarm1                   | 2.27 | up | 3.41  | up |
| Tgfb1                   | 2.19 | up | 3.20  | up |
| Tgm1                    | 2.78 | up | 2.71  | up |
| Thbs1                   | 2.11 | up | 2.82  | up |
| Timp1                   | 7.49 | up | 13.00 | up |
| Tlr13                   | 2.47 | up | 5.43  | up |
| Tlr8                    | 2.02 | up | 2.55  | up |
| Tm4sf19                 | 2.85 | up | 3.56  | up |
| Tmem173                 | 2.18 | up | 2.59  | up |
| Tnc                     | 7.37 | up | 9.10  | up |
| Tnfrsf10b               | 2.43 | up | 2.31  | up |
| Tnfrsf12a               | 2.23 | up | 2.62  | up |
| Tnip3                   | 5.43 | up | 5.63  | up |
| Top2a                   | 2.24 | up | 2.87  | up |
| Tpx2                    | 2.02 | up | 2.38  | up |
| Trem2                   | 3.90 | up | 4.72  | up |
| Tubb6                   | 2.43 | up | 4.19  | up |

|                                      |      |      |      |      |
|--------------------------------------|------|------|------|------|
| Uck2                                 | 2.14 | up   | 2.69 | up   |
| Vcan                                 | 3.21 | up   | 7.11 | up   |
| 2810453I06Rik                        | 2.24 | down | 2.01 | down |
| Abi3bp                               | 2.10 | down | 2.64 | down |
| Acox1                                | 2.69 | down | 6.13 | down |
| Adra1a                               | 2.08 | down | 2.64 | down |
| Alas2                                | 5.81 | down | 8.49 | down |
| Aox3                                 | 3.84 | down | 6.73 | down |
| Arhgef38                             | 2.92 | down | 4.27 | down |
| Atp6v1c2                             | 2.58 | down | 3.22 | down |
| Atp7b                                | 2.08 | down | 3.33 | down |
| Bpgm                                 | 2.51 | down | 2.16 | down |
| Chad                                 | 3.52 | down | 5.43 | down |
| Colq                                 | 2.12 | down | 2.26 | down |
| Cst8                                 | 3.29 | down | 3.31 | down |
| Cyp1a1                               | 4.13 | down | 4.37 | down |
| Cyp4a12b                             | 2.72 | down | 2.21 | down |
| Cyt11                                | 2.18 | down | 2.27 | down |
| D630013G24Rik                        | 2.79 | down | 4.30 | down |
| Ear1                                 | 2.13 | down | 2.55 | down |
| Ecm2                                 | 2.19 | down | 2.37 | down |
| Edn3                                 | 2.02 | down | 2.59 | down |
| Ednrb                                | 2.01 | down | 2.07 | down |
| Faim2                                | 3.02 | down | 3.94 | down |
| Fam13a                               | 2.17 | down | 3.04 | down |
| Fam46c                               | 3.03 | down | 2.83 | down |
| Fgfr2                                | 2.13 | down | 2.69 | down |
| Fhdc1                                | 2.16 | down | 2.86 | down |
| Gm10035 Mettl7a2<br> Mettl7a1 Higd1c | 2.08 | down | 3.07 | down |
| Gria1                                | 2.34 | down | 2.62 | down |
| Gsta3                                | 2.06 | down | 2.85 | down |
| Hc                                   | 2.43 | down | 6.30 | down |
| Hspa1a                               | 2.17 | down | 2.42 | down |
| Igfbp3                               | 5.74 | down | 4.09 | down |
| Igfbp6                               | 2.96 | down | 4.07 | down |
| Itih4                                | 2.59 | down | 3.28 | down |
| Kcnj13                               | 2.51 | down | 3.35 | down |



|              |      |      |      |      |
|--------------|------|------|------|------|
| Krt79        | 2.03 | down | 2.03 | down |
| Lrat         | 2.82 | down | 4.04 | down |
| Lypd2        | 3.91 | down | 4.13 | down |
| Mettl7a1     | 2.25 | down | 3.43 | down |
| Muc5b        | 2.76 | down | 2.18 | down |
| Npr3         | 2.02 | down | 3.77 | down |
| Npw          | 2.06 | down | 2.50 | down |
| Nrxn2        | 2.67 | down | 3.25 | down |
| Pcolce2      | 2.42 | down | 2.96 | down |
| Pde8b        | 2.26 | down | 2.88 | down |
| Pigr         | 2.81 | down | 2.02 | down |
| Pla2g1b      | 2.58 | down | 3.45 | down |
| Pon1         | 2.20 | down | 3.57 | down |
| Pppb         | 2.75 | down | 2.87 | down |
| Rtkn2        | 2.07 | down | 3.76 | down |
| S100g        | 2.00 | down | 2.68 | down |
| Scgb1c1      | 2.41 | down | 3.16 | down |
| Sec14l4      | 2.18 | down | 3.71 | down |
| Slc4a5       | 2.44 | down | 4.27 | down |
| Slc7a10 Lrp3 | 2.98 | down | 3.66 | down |
| Slco4c1      | 2.07 | down | 2.96 | down |
| Stmn2        | 2.01 | down | 2.78 | down |
| Sult1d1      | 2.37 | down | 2.43 | down |
| Tff2         | 3.66 | down | 2.03 | down |
| Thbs3        | 2.56 | down | 2.74 | down |
| Tppp3        | 2.14 | down | 2.45 | down |
| Upk3b        | 2.23 | down | 2.13 | down |

**Transcript list 4 (UC-unchanged) – *Il13ra1*<sup>-/-</sup> specific transcripts induced by bleomycin**

| Gene symbol                     | Wild type   |           | <i>Il13ra1</i> <sup>-/-</sup> |           |
|---------------------------------|-------------|-----------|-------------------------------|-----------|
|                                 | Fold change | Direction | Fold change                   | Direction |
| 5430435G22Rik                   | UC          | UC        | 2.86                          | up        |
| A430084P05Rik                   | UC          | UC        | 2.55                          | up        |
| AB124611                        | UC          | UC        | 2.14                          | up        |
| 6330406I15Rik                   | UC          | UC        | 2.77                          | up        |
| 9030425E11Rik                   | UC          | UC        | 2.10                          | up        |
| 2610524H06Rik                   | UC          | UC        | 2.15                          | up        |
| Adam23                          | UC          | UC        | 2.57                          | up        |
| Adam8                           | UC          | UC        | 3.33                          | up        |
| Adamts1                         | UC          | UC        | 2.45                          | up        |
| Adamts12                        | UC          | UC        | 2.31                          | up        |
| Adm                             | UC          | UC        | 2.13                          | up        |
| AF251705                        | UC          | UC        | 2.31                          | up        |
| Al607873                        | UC          | UC        | 3.15                          | up        |
| Alox5ap                         | UC          | UC        | 2.20                          | up        |
| Ammecr1                         | UC          | UC        | 2.03                          | up        |
| Apoc2                           | UC          | UC        | 3.53                          | up        |
| Armcx4                          | UC          | UC        | 2.17                          | up        |
| Atf3                            | UC          | UC        | 3.16                          | up        |
| Atp1a3                          | UC          | UC        | 2.46                          | up        |
| Atp8b1                          | UC          | UC        | 2.08                          | up        |
| Atp8b4                          | UC          | UC        | 2.07                          | up        |
| B430306N03Rik                   | UC          | UC        | 2.14                          | up        |
| BC023105                        | UC          | UC        | 2.64                          | up        |
| BC055004                        | UC          | UC        | 2.00                          | up        |
| Bcl2a1c                         | UC          | UC        | 2.04                          | up        |
| Bcl2a1d Bcl2a1a Bcl2a1b Bcl2a1c | UC          | UC        | 2.50                          | up        |
| Bcl3                            | UC          | UC        | 2.14                          | up        |
| Bmper                           | UC          | UC        | 2.44                          | up        |
| Bub1                            | UC          | UC        | 2.14                          | up        |
| C5ar1                           | UC          | UC        | 2.38                          | up        |
| C79407                          | UC          | UC        | 2.13                          | up        |
| Car13                           | UC          | UC        | 2.34                          | up        |
| Casp4                           | UC          | UC        | 2.04                          | up        |

|              |    |    |      |    |
|--------------|----|----|------|----|
| Ccdc109b     | UC | UC | 2.31 | up |
| Ccdc80       | UC | UC | 2.35 | up |
| Ccdc86 Gpr44 | UC | UC | 2.27 | up |
| Ccl12        | UC | UC | 2.66 | up |
| Cd109        | UC | UC | 2.22 | up |
| Cd14         | UC | UC | 2.39 | up |
| Cd177        | UC | UC | 2.48 | up |
| Cd180        | UC | UC | 3.22 | up |
| Cd200r1      | UC | UC | 2.45 | up |
| Cd300ld      | UC | UC | 2.61 | up |
| Cd300lf      | UC | UC | 3.07 | up |
| Cd48         | UC | UC | 2.10 | up |
| Cd52         | UC | UC | 2.23 | up |
| Cd53         | UC | UC | 2.18 | up |
| Cenpa        | UC | UC | 2.05 | up |
| Cfb          | UC | UC | 3.10 | up |
| Cfp          | UC | UC | 2.02 | up |
| Ckap2        | UC | UC | 2.55 | up |
| Cks1b        | UC | UC | 2.74 | up |
| Cks2         | UC | UC | 2.04 | up |
| Clca2 Clca1  | UC | UC | 2.30 | up |
| Clec4a1      | UC | UC | 3.34 | up |
| Clec4a3      | UC | UC | 2.30 | up |
| Clec4d       | UC | UC | 3.19 | up |
| Clec4e       | UC | UC | 7.69 | up |
| Clec7a       | UC | UC | 2.85 | up |
| Col12a1      | UC | UC | 2.09 | up |
| Col1a2       | UC | UC | 2.89 | up |
| Col3a1       | UC | UC | 2.76 | up |
| Col6a3       | UC | UC | 2.32 | up |
| Col8a1       | UC | UC | 2.02 | up |
| Cotl1        | UC | UC | 2.39 | up |
| Csf3r        | UC | UC | 2.12 | up |
| Cstb         | UC | UC | 2.24 | up |
| Ctsk         | UC | UC | 2.19 | up |
| Cx3cr1       | UC | UC | 2.00 | up |
| Cxcl2        | UC | UC | 3.32 | up |

|                     |    |    |      |    |
|---------------------|----|----|------|----|
| Cybb                | UC | UC | 2.36 | up |
| Cyp4f18             | UC | UC | 3.13 | up |
| Cysltr1             | UC | UC | 2.34 | up |
| Dab2                | UC | UC | 2.11 | up |
| Dbn1                | UC | UC | 2.34 | up |
| Dck                 | UC | UC | 2.29 | up |
| Dhx58               | UC | UC | 2.78 | up |
| Dlgap5              | UC | UC | 2.09 | up |
| Dpep2               | UC | UC | 2.84 | up |
| E030037K03Rik       | UC | UC | 2.67 | up |
| Ect2                | UC | UC | 2.21 | up |
| Eda2r               | UC | UC | 2.26 | up |
| Eif2ak2             | UC | UC | 2.07 | up |
| Emilin2             | UC | UC | 2.44 | up |
| Enc1                | UC | UC | 2.23 | up |
| Evi2a Evi2b         | UC | UC | 2.37 | up |
| F10                 | UC | UC | 2.85 | up |
| F13a1               | UC | UC | 4.08 | up |
| Fabp7               | UC | UC | 3.64 | up |
| Fam20c              | UC | UC | 2.08 | up |
| Fam49b              | UC | UC | 2.03 | up |
| Fbln2               | UC | UC | 2.69 | up |
| Fbn1 Gm9913         | UC | UC | 2.94 | up |
| Fcer1g              | UC | UC | 2.23 | up |
| Fcgr1               | UC | UC | 5.68 | up |
| Fcgr4               | UC | UC | 3.14 | up |
| Fermt3              | UC | UC | 2.13 | up |
| Fgf2                | UC | UC | 2.36 | up |
| Fgr                 | UC | UC | 2.61 | up |
| Fhl3                | UC | UC | 2.57 | up |
| Fkbp10 Nt5c3l       | UC | UC | 3.03 | up |
| Folr2               | UC | UC | 2.14 | up |
| Foxm1 4933413G19Rik | UC | UC | 2.05 | up |
| Fstl1               | UC | UC | 3.01 | up |
| Fyb                 | UC | UC | 2.38 | up |
| Gas2l3              | UC | UC | 3.00 | up |
| Gas5                | UC | UC | 2.03 | up |

|               |    |    |      |    |
|---------------|----|----|------|----|
| Gas7          | UC | UC | 2.15 | up |
| Gda           | UC | UC | 2.54 | up |
| Gm10879       | UC | UC | 2.04 | up |
| Gm12250       | UC | UC | 3.29 | up |
| Gm13139       | UC | UC | 2.63 | up |
| Gm1418        | UC | UC | 2.06 | up |
| Gm4951        | UC | UC | 2.18 | up |
| Gm5150        | UC | UC | 2.05 | up |
| Gm5431        | UC | UC | 3.16 | up |
| Gm6377        | UC | UC | 2.36 | up |
| Gm885         | UC | UC | 3.05 | up |
| Gm9975        | UC | UC | 2.10 | up |
| Gpr176        | UC | UC | 2.39 | up |
| Gpr35         | UC | UC | 2.27 | up |
| Gpr65         | UC | UC | 2.56 | up |
| Gusb          | UC | UC | 2.00 | up |
| Havcr2        | UC | UC | 2.22 | up |
| Hcls1         | UC | UC | 2.17 | up |
| Hist1h2bb     | UC | UC | 2.25 | up |
| Hist1h2bm     | UC | UC | 2.05 | up |
| Hmox1         | UC | UC | 2.99 | up |
| I830012O16Rik | UC | UC | 2.01 | up |
| I830127L07Rik | UC | UC | 2.20 | up |
| Ifi27l2a      | UC | UC | 2.65 | up |
| Ifi44         | UC | UC | 2.30 | up |
| Ifit1         | UC | UC | 2.74 | up |
| Ifit2         | UC | UC | 2.40 | up |
| Ifit3         | UC | UC | 2.51 | up |
| Ifitm6        | UC | UC | 2.30 | up |
| Igsf6         | UC | UC | 3.23 | up |
| Ilgp1         | UC | UC | 3.15 | up |
| Il10ra        | UC | UC | 2.21 | up |
| Il1b          | UC | UC | 2.84 | up |
| Il1r2         | UC | UC | 2.76 | up |
| Il1rl2        | UC | UC | 2.14 | up |
| Il2ra         | UC | UC | 2.16 | up |
| Iqgap3        | UC | UC | 2.03 | up |

|                                   |    |    |      |    |
|-----------------------------------|----|----|------|----|
| Irf5                              | UC | UC | 2.63 | up |
| Irf7                              | UC | UC | 4.56 | up |
| Irg1                              | UC | UC | 5.21 | up |
| Irgm1                             | UC | UC | 2.28 | up |
| Itga5                             | UC | UC | 3.26 | up |
| Itgb2                             | UC | UC | 2.06 | up |
| Kcnn4                             | UC | UC | 2.78 | up |
| Kdelr3                            | UC | UC | 3.34 | up |
| Kif26b                            | UC | UC | 2.10 | up |
| Lair1                             | UC | UC | 2.62 | up |
| Lat2                              | UC | UC | 2.72 | up |
| Lcn2                              | UC | UC | 2.09 | up |
| Lcp2                              | UC | UC | 2.15 | up |
| Lgals1                            | UC | UC | 2.14 | up |
| Lgals3                            | UC | UC | 2.15 | up |
| Lhfp12                            | UC | UC | 2.18 | up |
| Lilra6 Pira11 Pira4 Pira7 Gm14548 | UC | UC | 2.10 | up |
| Lilrb3                            | UC | UC | 2.89 | up |
| Litaf                             | UC | UC | 2.02 | up |
| Loxl2                             | UC | UC | 2.62 | up |
| Lpxn                              | UC | UC | 2.33 | up |
| Lrg1                              | UC | UC | 2.19 | up |
| Lrp12                             | UC | UC | 2.07 | up |
| Ly6i                              | UC | UC | 2.04 | up |
| Ly9                               | UC | UC | 2.21 | up |
| Mad2l1                            | UC | UC | 2.14 | up |
| Mcm5                              | UC | UC | 2.06 | up |
| Mfap5                             | UC | UC | 2.03 | up |
| Mik1                              | UC | UC | 2.56 | up |
| Mmp13                             | UC | UC | 2.92 | up |
| Mmp3                              | UC | UC | 2.53 | up |
| Mpeg1                             | UC | UC | 2.18 | up |
| Ms4a14                            | UC | UC | 2.59 | up |
| Ms4a4c                            | UC | UC | 4.41 | up |
| Ms4a6b                            | UC | UC | 3.30 | up |
| Mthfd2                            | UC | UC | 2.19 | up |
| Mx1                               | UC | UC | 3.50 | up |

|                                                       |    |    |      |    |
|-------------------------------------------------------|----|----|------|----|
| Myo1f                                                 | UC | UC | 2.55 | up |
| Naip2                                                 | UC | UC | 2.20 | up |
| Ncapg                                                 | UC | UC | 2.09 | up |
| Ncf1                                                  | UC | UC | 2.42 | up |
| Ncf2                                                  | UC | UC | 2.15 | up |
| Ncf4                                                  | UC | UC | 2.67 | up |
| Nckap1l                                               | UC | UC | 2.57 | up |
| Nfkbie                                                | UC | UC | 2.00 | up |
| Nlgn2                                                 | UC | UC | 2.11 | up |
| Nlrp1c-ps                                             | UC | UC | 2.42 | up |
| Nuf2                                                  | UC | UC | 2.10 | up |
| Nusap1 Oip5                                           | UC | UC | 2.07 | up |
| Oas1a                                                 | UC | UC | 2.12 | up |
| Oas1g Oas1a                                           | UC | UC | 3.92 | up |
| Oas2                                                  | UC | UC | 3.45 | up |
| Oas3                                                  | UC | UC | 2.84 | up |
| Oasl1                                                 | UC | UC | 3.29 | up |
| Oasl2                                                 | UC | UC | 2.13 | up |
| Pappa                                                 | UC | UC | 2.68 | up |
| Parvg                                                 | UC | UC | 2.03 | up |
| Pcdh7                                                 | UC | UC | 2.04 | up |
| Pdgfc                                                 | UC | UC | 2.65 | up |
| Peg3                                                  | UC | UC | 2.29 | up |
| Phf11                                                 | UC | UC | 2.18 | up |
| Pilra                                                 | UC | UC | 2.18 | up |
| Pira1 Pira2 Pira6 Pira7 Pira11 Lilra6 Gm15448 Gm14548 | UC | UC | 2.87 | up |
| Pira11 Pira7 Pira6 Lilra6 Gm14548 Gm15448 Pira2       | UC | UC | 2.65 | up |
| Plac8                                                 | UC | UC | 3.27 | up |
| Plek                                                  | UC | UC | 2.57 | up |
| Plekho2                                               | UC | UC | 2.58 | up |
| Plk2                                                  | UC | UC | 2.34 | up |
| Plk3                                                  | UC | UC | 2.45 | up |
| Prg4                                                  | UC | UC | 2.45 | up |
| Prr11                                                 | UC | UC | 2.34 | up |
| Prrx1                                                 | UC | UC | 2.24 | up |

|                                   |    |    |      |    |
|-----------------------------------|----|----|------|----|
| Psat1                             | UC | UC | 2.52 | up |
| Pstpip2                           | UC | UC | 2.14 | up |
| Ptges                             | UC | UC | 2.20 | up |
| Pyhin1                            | UC | UC | 2.97 | up |
| Racgap1                           | UC | UC | 2.64 | up |
| Rap2b                             | UC | UC | 2.03 | up |
| Rbm3                              | UC | UC | 2.02 | up |
| Retnla                            | UC | UC | 3.61 | up |
| Retnlg                            | UC | UC | 2.83 | up |
| Rgs1                              | UC | UC | 2.51 | up |
| Rgs4                              | UC | UC | 2.13 | up |
| Ripk3                             | UC | UC | 2.56 | up |
| Rnd3                              | UC | UC | 2.19 | up |
| Rnf149                            | UC | UC | 2.24 | up |
| Rnf213                            | UC | UC | 2.18 | up |
| Rrm1                              | UC | UC | 2.18 | up |
| Rsad2                             | UC | UC | 2.77 | up |
| Rtp4                              | UC | UC | 2.50 | up |
| S100a6                            | UC | UC | 2.09 | up |
| S100a8                            | UC | UC | 2.34 | up |
| Sap30                             | UC | UC | 2.04 | up |
| Sbno2                             | UC | UC | 2.25 | up |
| Serpina3h Serpina3g <br>Serpina3i | UC | UC | 2.37 | up |
| Sfpi1                             | UC | UC | 2.56 | up |
| Sgol2                             | UC | UC | 2.18 | up |
| Sh2b2                             | UC | UC | 2.08 | up |
| Sh3bp2                            | UC | UC | 2.46 | up |
| Siglec1                           | UC | UC | 2.57 | up |
| Sirpb1a Sirpb1b LOC1<br>00038947  | UC | UC | 2.37 | up |
| Sirpb1b Sirpb1a LOC1<br>00038947  | UC | UC | 2.66 | up |
| Slamf7                            | UC | UC | 2.32 | up |
| Slamf9                            | UC | UC | 2.13 | up |
| Slc15a3                           | UC | UC | 2.52 | up |
| Slc7a5                            | UC | UC | 2.32 | up |
| Slfn1                             | UC | UC | 3.64 | up |
| Slfn10-ps Slfn8                   | UC | UC | 2.49 | up |



|                       |    |    |      |      |
|-----------------------|----|----|------|------|
| Slfn2                 | UC | UC | 2.53 | up   |
| Slfn4                 | UC | UC | 9.21 | up   |
| Slfn8                 | UC | UC | 3.46 | up   |
| Slfn9                 | UC | UC | 2.49 | up   |
| Smc2                  | UC | UC | 2.03 | up   |
| Snai1                 | UC | UC | 2.03 | up   |
| Spc25                 | UC | UC | 2.23 | up   |
| Srm                   | UC | UC | 2.08 | up   |
| Srxn1                 | UC | UC | 2.18 | up   |
| Tagln                 | UC | UC | 2.33 | up   |
| Tbxas1                | UC | UC | 2.49 | up   |
| Tcf19                 | UC | UC | 2.12 | up   |
| Tcfec                 | UC | UC | 2.34 | up   |
| Tfpi2                 | UC | UC | 2.35 | up   |
| Tifab                 | UC | UC | 2.10 | up   |
| Tlr1                  | UC | UC | 2.74 | up   |
| Tlr2                  | UC | UC | 2.25 | up   |
| Tlr7                  | UC | UC | 2.69 | up   |
| Tlr9                  | UC | UC | 2.06 | up   |
| Tmem106a              | UC | UC | 2.21 | up   |
| Tnfaip2               | UC | UC | 2.03 | up   |
| Tnfrsf1b              | UC | UC | 2.32 | up   |
| Tnfrsf23              | UC | UC | 2.22 | up   |
| Tnfsf18               | UC | UC | 2.61 | up   |
| Trem1                 | UC | UC | 2.45 | up   |
| Trim30a               | UC | UC | 2.02 | up   |
| Trim30d               | UC | UC | 2.32 | up   |
| Tspan4                | UC | UC | 2.46 | up   |
| Tyrobp                | UC | UC | 2.15 | up   |
| Ubash3b               | UC | UC | 2.12 | up   |
| Vav1                  | UC | UC | 2.54 | up   |
| Vsig4                 | UC | UC | 2.82 | up   |
| Wisp1                 | UC | UC | 2.75 | up   |
| Zbp1                  | UC | UC | 3.96 | up   |
| 1110012J17Rik         | UC | UC | 2.06 | down |
| 1200009O22Rik Gm16499 | UC | UC | 2.18 | down |
| 1300014I06Rik         | UC | UC | 2.16 | down |

|                       |    |    |      |      |
|-----------------------|----|----|------|------|
| 1810010H24Rik         | UC | UC | 2.14 | down |
| 2410066E13Rik         | UC | UC | 2.08 | down |
| 3222401L13Rik         | UC | UC | 2.14 | down |
| 4930451C15Rik         | UC | UC | 2.35 | down |
| 4930529M08Rik         | UC | UC | 2.28 | down |
| 4930578G10Rik         | UC | UC | 2.59 | down |
| 4933409K07Rik Gm10590 | UC | UC | 2.19 | down |
| 4933436C20Rik         | UC | UC | 2.09 | down |
| 5330417C22Rik         | UC | UC | 2.96 | down |
| 9230104L09Rik         | UC | UC | 2.38 | down |
| 9330159F19Rik         | UC | UC | 2.09 | down |
| Aass                  | UC | UC | 2.19 | down |
| Acaca                 | UC | UC | 2.11 | down |
| Ace2                  | UC | UC | 2.10 | down |
| Acot1                 | UC | UC | 2.23 | down |
| Acss1                 | UC | UC | 2.66 | down |
| Acss2                 | UC | UC | 2.10 | down |
| Actc1                 | UC | UC | 2.13 | down |
| Ak7                   | UC | UC | 2.18 | down |
| Aldh1a7               | UC | UC | 2.47 | down |
| Aldh3a1               | UC | UC | 2.59 | down |
| Aldh6a1               | UC | UC | 2.18 | down |
| Ank3                  | UC | UC | 2.32 | down |
| Arl4d                 | UC | UC | 2.03 | down |
| Arrdc3                | UC | UC | 2.12 | down |
| Atp1a2                | UC | UC | 2.51 | down |
| Atp2a3                | UC | UC | 2.31 | down |
| AU021092              | UC | UC | 2.70 | down |
| Bmp6                  | UC | UC | 2.61 | down |
| Car3                  | UC | UC | 2.84 | down |
| Car8                  | UC | UC | 2.11 | down |
| Cbx7                  | UC | UC | 2.16 | down |
| Ccdc108               | UC | UC | 2.04 | down |
| Ccdc141               | UC | UC | 2.14 | down |
| Cckar                 | UC | UC | 2.20 | down |
| Cdkl5                 | UC | UC | 2.74 | down |
| Ces1d                 | UC | UC | 2.05 | down |

|               |    |    |      |      |
|---------------|----|----|------|------|
| Chchd10       | UC | UC | 2.02 | down |
| Chia          | UC | UC | 2.04 | down |
| Chrdl1        | UC | UC | 2.05 | down |
| Cidec         | UC | UC | 2.72 | down |
| Cldn10        | UC | UC | 2.30 | down |
| Clec14a       | UC | UC | 2.12 | down |
| Clec1a        | UC | UC | 2.01 | down |
| Cmtm8         | UC | UC | 2.11 | down |
| Cntfr         | UC | UC | 2.31 | down |
| Cox7a1        | UC | UC | 2.39 | down |
| Cox8b         | UC | UC | 3.07 | down |
| Cpm           | UC | UC | 2.94 | down |
| Cyp2a4 Cyp2a5 | UC | UC | 2.76 | down |
| Cyp2a5        | UC | UC | 2.55 | down |
| Cyp2b10       | UC | UC | 2.96 | down |
| Cyp2s1        | UC | UC | 2.00 | down |
| Cyp39a1       | UC | UC | 2.01 | down |
| Cyp4b1        | UC | UC | 2.67 | down |
| Dnahc3        | UC | UC | 2.01 | down |
| Dnahc6        | UC | UC | 2.21 | down |
| Dnali1        | UC | UC | 2.17 | down |
| Dpep1         | UC | UC | 2.09 | down |
| Dpp4          | UC | UC | 2.07 | down |
| Egfl6         | UC | UC | 2.84 | down |
| Elf5          | UC | UC | 2.00 | down |
| Enpep         | UC | UC | 2.06 | down |
| Etv5          | UC | UC | 2.36 | down |
| Exosc7        | UC | UC | 2.23 | down |
| Exph5         | UC | UC | 2.22 | down |
| Fam107a       | UC | UC | 2.08 | down |
| Fam82a1       | UC | UC | 2.44 | down |
| Fasn          | UC | UC | 2.43 | down |
| Fgf1          | UC | UC | 2.73 | down |
| Fgfr4         | UC | UC | 2.06 | down |
| Fibin         | UC | UC | 2.62 | down |
| Fmo1          | UC | UC | 2.06 | down |
| Fmo3          | UC | UC | 2.65 | down |

|               |    |    |      |      |
|---------------|----|----|------|------|
| Fmo5          | UC | UC | 2.34 | down |
| Gcom1         | UC | UC | 2.32 | down |
| Glb1l2        | UC | UC | 2.00 | down |
| Glp1r         | UC | UC | 2.08 | down |
| Glycam1       | UC | UC | 2.40 | down |
| Gm4956        | UC | UC | 2.47 | down |
| Gm5226        | UC | UC | 2.13 | down |
| Gpd1          | UC | UC | 2.42 | down |
| Gpr155        | UC | UC | 2.24 | down |
| Grb7          | UC | UC | 2.29 | down |
| Grtp1         | UC | UC | 2.17 | down |
| Gstm1         | UC | UC | 2.18 | down |
| Hba-a1 Hba-a2 | UC | UC | 2.33 | down |
| Hba-a2 Hba-a1 | UC | UC | 2.38 | down |
| Hbb-b1 Hbb-b2 | UC | UC | 2.80 | down |
| Hbb-b2 Hbb-b1 | UC | UC | 2.80 | down |
| Hecw2         | UC | UC | 2.09 | down |
| Hmgcs2        | UC | UC | 2.33 | down |
| Hpgd          | UC | UC | 2.27 | down |
| Hspa1a Hspa1b | UC | UC | 2.14 | down |
| Hydin         | UC | UC | 2.20 | down |
| Inmt          | UC | UC | 2.87 | down |
| Irs1          | UC | UC | 2.25 | down |
| Kcnj15        | UC | UC | 2.22 | down |
| Kcnk2         | UC | UC | 2.05 | down |
| Klf15         | UC | UC | 2.50 | down |
| Lama3         | UC | UC | 2.22 | down |
| Lamp3         | UC | UC | 2.85 | down |
| Ldhb          | UC | UC | 2.31 | down |
| Lepr          | UC | UC | 2.15 | down |
| Leprel1       | UC | UC | 2.10 | down |
| Lgi3          | UC | UC | 4.21 | down |
| Lrrc26        | UC | UC | 2.14 | down |
| Ltbp4         | UC | UC | 2.22 | down |
| Lyz1          | UC | UC | 2.93 | down |
| Maob          | UC | UC | 2.71 | down |
| Mapt          | UC | UC | 2.07 | down |

|                     |    |    |      |      |
|---------------------|----|----|------|------|
| Mb                  | UC | UC | 2.13 | down |
| Mlc1                | UC | UC | 2.33 | down |
| Mme                 | UC | UC | 2.61 | down |
| Mmp15               | UC | UC | 2.45 | down |
| Myl4                | UC | UC | 2.31 | down |
| Myl7                | UC | UC | 2.99 | down |
| Myo5c               | UC | UC | 2.05 | down |
| Nckap5              | UC | UC | 2.19 | down |
| Nipa1 A230056P14Rik | UC | UC | 2.20 | down |
| Npas2               | UC | UC | 2.45 | down |
| Nrn1                | UC | UC | 2.11 | down |
| Ociad2              | UC | UC | 2.43 | down |
| Osbpl6              | UC | UC | 2.41 | down |
| Pcp411              | UC | UC | 2.35 | down |
| Phactr1             | UC | UC | 2.14 | down |
| Pla2g2d             | UC | UC | 2.24 | down |
| Plce1               | UC | UC | 2.09 | down |
| Plip                | UC | UC | 2.19 | down |
| Pof1b               | UC | UC | 2.03 | down |
| Ppil6 Smpd2         | UC | UC | 2.61 | down |
| Ppp1r14c            | UC | UC | 2.80 | down |
| Prmt8               | UC | UC | 2.26 | down |
| Ptgfr               | UC | UC | 2.11 | down |
| Rab6b               | UC | UC | 2.02 | down |
| Rasgef1a            | UC | UC | 2.14 | down |
| Rasgrf2             | UC | UC | 2.48 | down |
| Rassf1 Gm9917 Hyal2 | UC | UC | 2.05 | down |
| Rbp4                | UC | UC | 2.08 | down |
| Rbpjl Matn4         | UC | UC | 2.08 | down |
| Reep6               | UC | UC | 2.41 | down |
| Reps2               | UC | UC | 2.07 | down |
| Rgnef               | UC | UC | 2.38 | down |
| Rgs9                | UC | UC | 2.22 | down |
| Rnf144a             | UC | UC | 2.18 | down |
| Rnf186              | UC | UC | 2.09 | down |
| Rsph4a              | UC | UC | 2.07 | down |
| Scgb3a2             | UC | UC | 2.01 | down |

|             |    |    |      |      |
|-------------|----|----|------|------|
| Sdpr        | UC | UC | 2.21 | down |
| Sgpp2       | UC | UC | 2.71 | down |
| Slc38a4     | UC | UC | 2.34 | down |
| Slc38a5     | UC | UC | 2.07 | down |
| Slc44a3     | UC | UC | 2.16 | down |
| Smad6       | UC | UC | 2.01 | down |
| Snca        | UC | UC | 5.64 | down |
| Sntb1       | UC | UC | 2.63 | down |
| Sorbs3      | UC | UC | 2.23 | down |
| Spef2       | UC | UC | 2.14 | down |
| Sym         | UC | UC | 2.09 | down |
| Tbc1d30     | UC | UC | 2.20 | down |
| Tcfcp2l1    | UC | UC | 2.20 | down |
| Thbd        | UC | UC | 2.25 | down |
| Thrsp       | UC | UC | 2.55 | down |
| Tinag       | UC | UC | 2.71 | down |
| Tmem100     | UC | UC | 2.63 | down |
| Tmem195     | UC | UC | 2.19 | down |
| Tmod1 Tstd2 | UC | UC | 2.24 | down |
| Tnni3       | UC | UC | 2.76 | down |
| Trpm6       | UC | UC | 2.12 | down |
| Tspan11     | UC | UC | 2.11 | down |
| Tspan13     | UC | UC | 2.02 | down |
| Tspan18     | UC | UC | 2.38 | down |
| Tst         | UC | UC | 2.17 | down |
| Ucp1        | UC | UC | 2.63 | down |
| Vipr2       | UC | UC | 2.43 | down |
| Vtn         | UC | UC | 2.27 | down |
| Wdr63       | UC | UC | 2.08 | down |
| Wfdc1       | UC | UC | 2.18 | down |

**Transcript list 5 (UC-unchanged)** – STRING-based analysis of bleomycin-induced *Il13ra1*<sup>-/-</sup> specific transcripts

|        | Gene symbol | Wild type   |           | <i>Il13ra1</i> <sup>-/-</sup> |           |
|--------|-------------|-------------|-----------|-------------------------------|-----------|
|        |             | Fold change | Direction | Fold change                   | Direction |
| Hub 1  | vav1        | UC          | UC        | 2.54                          | up        |
|        | slfn2       | UC          | UC        | 2.53                          | up        |
|        | lpxn        | UC          | UC        | 2.33                          | up        |
|        | fermt3      | UC          | UC        | 2.13                          | up        |
|        | plek        | UC          | UC        | 2.57                          | up        |
|        | itgb2       | UC          | UC        | 2.06                          | up        |
|        | rgs1        | UC          | UC        | 2.51                          | up        |
|        | cd14        | UC          | UC        | 2.39                          | up        |
|        | tlr2        | UC          | UC        | 2.25                          | up        |
|        | irf5        | UC          | UC        | 2.63                          | up        |
|        | lcp2        | UC          | UC        | 2.15                          | up        |
|        | fyb         | UC          | UC        | 2.38                          | up        |
|        | fcgr1       | UC          | UC        | 5.68                          | up        |
|        | hcls1       | UC          | UC        | 2.17                          | up        |
|        | tlr9        | UC          | UC        | 2.06                          | up        |
|        | nckap1l     | UC          | UC        | 2.57                          | up        |
|        | cd48        | UC          | UC        | 2.10                          | up        |
|        | cd53        | UC          | UC        | 2.18                          | up        |
|        | ctsk        | UC          | UC        | 2.19                          | up        |
|        | ncf4        | UC          | UC        | 2.67                          | up        |
|        | mpeg1       | UC          | UC        | 2.18                          | up        |
|        | clec4d      | UC          | UC        | 3.19                          | up        |
|        | irg1        | UC          | UC        | 5.21                          | up        |
|        | il10ra      | UC          | UC        | 2.21                          | up        |
|        | slc15a3     | UC          | UC        | 2.52                          | up        |
|        | cybb        | UC          | UC        | 2.36                          | up        |
|        | ncf2        | UC          | UC        | 2.15                          | up        |
|        | clec4e      | UC          | UC        | 7.69                          | up        |
| clec7a | UC          | UC          | 2.85      | up                            |           |

|  |          |    |    |      |      |
|--|----------|----|----|------|------|
|  | tyrobp   | UC | UC | 2.15 | up   |
|  | igsf6    | UC | UC | 3.23 | up   |
|  | sfpi1    | UC | UC | 2.56 | up   |
|  | gpr65    | UC | UC | 2.56 | up   |
|  | tlr1     | UC | UC | 2.74 | up   |
|  | tlr7     | UC | UC | 2.69 | up   |
|  | fcer1g   | UC | UC | 2.23 | up   |
|  | slfn4    | UC | UC | 9.21 | up   |
|  | ms4a6b   | UC | UC | 3.30 | up   |
|  | fcgr4    | UC | UC | 3.14 | up   |
|  | lair1    | UC | UC | 2.62 | up   |
|  | lilrb3   | UC | UC | 2.89 | up   |
|  | clec4a3  | UC | UC | 2.30 | up   |
|  | af251705 | UC | UC | 2.31 | up   |
|  | havcr2   | UC | UC | 2.22 | up   |
|  | cd300lf  | UC | UC | 3.07 | up   |
|  | slamf9   | UC | UC | 2.13 | up   |
|  | cd300ld  | UC | UC | 2.61 | up   |
|  | csf3r    | UC | UC | 2.12 | up   |
|  | lyz1     | UC | UC | 2.93 | down |
|  | pilra    | UC | UC | 2.18 | up   |
|  | fgr      | UC | UC | 2.61 | up   |
|  | lat2     | UC | UC | 2.72 | up   |
|  | ncf1     | UC | UC | 2.42 | up   |
|  | alox5ap  | UC | UC | 2.20 | up   |
|  | il1b     | UC | UC | 2.84 | up   |
|  | ccl12    | UC | UC | 2.66 | up   |
|  | cxcl2    | UC | UC | 3.32 | up   |
|  | myo1f    | UC | UC | 2.55 | up   |
|  | cx3cr1   | UC | UC | 2.00 | up   |
|  | mmp13    | UC | UC | 2.92 | up   |
|  | mmp3     | UC | UC | 2.53 | up   |
|  | rgnef    | UC | UC | 2.38 | down |



|       |          |    |      |      |      |
|-------|----------|----|------|------|------|
|       | s100a8   | UC | UC   | 2.34 | up   |
|       | cstb     | UC | UC   | 2.24 | up   |
|       | ms4a4c   | UC | UC   | 4.41 | up   |
|       | cotl1    | UC | UC   | 2.39 | up   |
| Hub 2 | mf213    | UC | UC   | 2.18 | up   |
|       | oas1a    | UC | UC   | 2.12 | up   |
|       | col6a3   | UC | UC   | 2.32 | up   |
|       | iigp1    | UC | UC   | 3.15 | up   |
|       | ifit2    | UC | UC   | 2.40 | up   |
|       | oasl2    | UC | UC   | 2.13 | up   |
|       | ifit3    | UC | UC   | 2.51 | up   |
|       | dhx58    | UC | UC   | 2.78 | up   |
|       | irgm1    | UC | UC   | 2.28 | up   |
|       | rsad2    | UC | UC   | 2.77 | up   |
|       | col3a1   | UC | UC   | 2.76 | up   |
|       | ifit1    | UC | UC   | 2.74 | up   |
|       | rtp4     | UC | UC   | 2.50 | up   |
|       | ifi44    | UC | UC   | 2.30 | up   |
|       | oas2     | UC | UC   | 3.45 | up   |
|       | adam8    | UC | UC   | 3.33 | up   |
|       | irf7     | UC | UC   | 4.56 | up   |
|       | col1a2   | UC | UC   | 2.89 | up   |
|       | zbp1     | UC | UC   | 3.96 | up   |
|       | oasl1    | UC | UC   | 3.29 | up   |
|       | oas3     | UC | UC   | 2.84 | up   |
|       | fstl1    | UC | UC   | 3.01 | up   |
|       | col8a1   | UC | UC   | 2.02 | up   |
|       | col12a1  | UC | UC   | 2.09 | up   |
|       | mx1      | UC | UC   | 3.50 | up   |
|       | lepre1   | UC | UC   | 2.10 | down |
|       | mfap5    | UC | UC   | 2.03 | up   |
|       | ifi27l2a | UC | UC   | 2.65 | up   |
| lama3 | UC       | UC | 2.22 | down |      |

|        |         |    |      |      |    |
|--------|---------|----|------|------|----|
|        | itga5   | UC | UC   | 3.26 | up |
| Hub 3  | racgap1 | UC | UC   | 2.64 | up |
|        | nuf2    | UC | UC   | 2.10 | up |
|        | tcf19   | UC | UC   | 2.12 | up |
|        | cks2    | UC | UC   | 2.04 | up |
|        | cks1b   | UC | UC   | 2.74 | up |
|        | rrm1    | UC | UC   | 2.18 | up |
|        | smc2    | UC | UC   | 2.03 | up |
|        | cenpa   | UC | UC   | 2.05 | up |
|        | spc25   | UC | UC   | 2.23 | up |
|        | sgol2   | UC | UC   | 2.18 | up |
|        | ect2    | UC | UC   | 2.21 | up |
|        | mcm5    | UC | UC   | 2.06 | up |
|        | ckap2   | UC | UC   | 2.55 | up |
|        | ncapg   | UC | UC   | 2.09 | up |
|        | mad2l1  | UC | UC   | 2.14 | up |
|        | bub1    | UC | UC   | 2.14 | up |
|        | plk2    | UC | UC   | 2.34 | up |
|        | c79407  | UC | UC   | 2.13 | up |
|        | prp11   | UC | UC   | 2.34 | up |
|        | dlgap5  | UC | UC   | 2.09 | up |
| iqgap3 | UC      | UC | 2.03 | up   |    |
| dck    | UC      | UC | 2.29 | up   |    |
| ak7    | UC      | UC | 2.18 | down |    |
| plk3   | UC      | UC | 2.45 | up   |    |

**Transcript list 6** (UC-unchanged)- Differentially expressed genes following IL-13 administration

| Gene symbol             | Wild type   |           | <i>Il13ra1</i> <sup>-/-</sup> |           |
|-------------------------|-------------|-----------|-------------------------------|-----------|
|                         | Fold change | Direction | Fold change                   | Direction |
| Ear11                   | 59.260426   | up        | UC                            | UC        |
| Fbp1                    | 27.347633   | up        | UC                            | UC        |
| Chi3l4                  | 27.111227   | up        | UC                            | UC        |
| Slc26a4                 | 21.92674    | up        | UC                            | UC        |
| Ccl24                   | 21.373875   | up        | UC                            | UC        |
| Sprr2a1 Sprr2a2 Sprr2a3 | 13.397314   | up        | UC                            | UC        |
| Gm7455                  | 10.822239   | up        | UC                            | UC        |
| Mmp12                   | 10.612423   | up        | UC                            | UC        |
| AA467197 Mir147         | 9.6796255   | up        | UC                            | UC        |
| Pla2g4c                 | 9.320497    | up        | UC                            | UC        |
| Ccl11                   | 8.772301    | up        | UC                            | UC        |
| Arg1                    | 8.11035     | up        | UC                            | UC        |
| Sprr2a1 Sprr2a3         | 7.7116857   | up        | UC                            | UC        |
| Sprr2a1 Sprr2a3         | 7.7111096   | up        | UC                            | UC        |
| Serpina3f Serpin3g      | 6.755627    | up        | UC                            | UC        |
| Tnfrsf9                 | 6.57428     | up        | UC                            | UC        |
| Tdo2                    | 6.253788    | up        | UC                            | UC        |
| Ccl17                   | 6.073012    | up        | UC                            | UC        |
| Ccl3                    | 5.9004555   | up        | UC                            | UC        |
| Tarm1                   | 5.750628    | up        | UC                            | UC        |
| Timp1                   | 5.5170827   | up        | UC                            | UC        |
| Tnip3                   | 5.478049    | up        | UC                            | UC        |
| Muc5ac                  | 5.2632837   | up        | UC                            | UC        |
| 4833422F24Rik           | 5.246499    | up        | UC                            | UC        |
| Gatm                    | 4.9530687   | up        | UC                            | UC        |
| Slc5a1                  | 4.9437985   | up        | UC                            | UC        |
| Alox15                  | 4.7892766   | up        | UC                            | UC        |
| Olf111                  | 4.636288    | up        | UC                            | UC        |
| Aldh1a3                 | 4.6357074   | up        | UC                            | UC        |
| Ch25h                   | 4.532558    | up        | UC                            | UC        |

|           |           |    |    |    |
|-----------|-----------|----|----|----|
| Scin      | 4.437473  | up | UC | UC |
| Saa3      | 4.412935  | up | UC | UC |
| Slc6a20a  | 4.3531814 | up | UC | UC |
| Agr2      | 4.272291  | up | UC | UC |
| Gm7455    | 4.2335687 | up | UC | UC |
| Ccl9      | 4.206263  | up | UC | UC |
| Ccl7      | 4.1862206 | up | UC | UC |
| Chia      | 4.148769  | up | UC | UC |
| Clca3     | 4.1198916 | up | UC | UC |
| Fer1l6    | 4.100723  | up | UC | UC |
| Mgl2      | 4.0301495 | up | UC | UC |
| Il1a      | 4.0300784 | up | UC | UC |
| Ctsk      | 4.002279  | up | UC | UC |
| Pdcd1lg2  | 3.8431704 | up | UC | UC |
| H2-M2     | 3.6854024 | up | UC | UC |
| Ccl2      | 3.666201  | up | UC | UC |
| Ly6i      | 3.6463394 | up | UC | UC |
| Fxyd4     | 3.5608778 | up | UC | UC |
| Selp      | 3.5294425 | up | UC | UC |
| Egln3     | 3.5135558 | up | UC | UC |
| Tm4sf19   | 3.4959147 | up | UC | UC |
| Slc7a11   | 3.4309478 | up | UC | UC |
| F10       | 3.419987  | up | UC | UC |
| Tnfaip6   | 3.4163158 | up | UC | UC |
| Ms4a6d    | 3.3102653 | up | UC | UC |
| Ccl8      | 3.2780128 | up | UC | UC |
| Rgs4      | 3.0972137 | up | UC | UC |
| Retnlg    | 3.0836515 | up | UC | UC |
| Chi3l3    | 3.0218334 | up | UC | UC |
| Irf4      | 3.0077603 | up | UC | UC |
| LOC672291 | 2.9965956 | up | UC | UC |
| Fetub     | 2.9484048 | up | UC | UC |
| Serpind1  | 2.9319265 | up | UC | UC |
| Fcer2a    | 2.9034307 | up | UC | UC |
| Cxcl2     | 2.8544912 | up | UC | UC |
| Il1b      | 2.8412926 | up | UC | UC |
| Gadd45g   | 2.7934818 | up | UC | UC |

|                               |           |    |    |    |
|-------------------------------|-----------|----|----|----|
| Cxcr2                         | 2.7823172 | up | UC | UC |
| Corin                         | 2.7736065 | up | UC | UC |
| Pigr                          | 2.7704785 | up | UC | UC |
| Irg1                          | 2.7399955 | up | UC | UC |
| Retnla                        | 2.7330158 | up | UC | UC |
| Sfrp2                         | 2.729295  | up | UC | UC |
| Aass                          | 2.7264466 | up | UC | UC |
| Niacr1                        | 2.7250917 | up | UC | UC |
| Tfpi2                         | 2.7196681 | up | UC | UC |
| Snord118                      | 2.672413  | up | UC | UC |
| Snord118                      | 2.6719697 | up | UC | UC |
| Plau                          | 2.6391973 | up | UC | UC |
| Itgax                         | 2.5162528 | up | UC | UC |
| Ccl22                         | 2.4924507 | up | UC | UC |
| Ankrd55                       | 2.4905958 | up | UC | UC |
| Inhba                         | 2.4746716 | up | UC | UC |
| Cd209e                        | 2.4671965 | up | UC | UC |
| Cldn1                         | 2.402606  | up | UC | UC |
| Serpina3h Serpina3g Serpina3i | 2.4024498 | up | UC | UC |
| Kynu                          | 2.4009714 | up | UC | UC |
| Tgm1                          | 2.398991  | up | UC | UC |
| ORF63                         | 2.3912435 | up | UC | UC |
| Slc7a2                        | 2.382441  | up | UC | UC |
| Rgs1                          | 2.3806674 | up | UC | UC |
| Fcgr2b                        | 2.3660252 | up | UC | UC |
| Il1rn                         | 2.3583891 | up | UC | UC |
| Cd14                          | 2.3228226 | up | UC | UC |
| Cd209d                        | 2.3216197 | up | UC | UC |
| P2ry2                         | 2.3152406 | up | UC | UC |
| Serpina3n                     | 2.3065624 | up | UC | UC |
| Cfp                           | 2.3000546 | up | UC | UC |
| Clec7a                        | 2.2943597 | up | UC | UC |
| Igf1                          | 2.2872272 | up | UC | UC |
| Ccr5 Ccr2                     | 2.2817216 | up | UC | UC |
| Ccr5 Ccr2                     | 2.279336  | up | UC | UC |
| Bhlhe40                       | 2.2667756 | up | UC | UC |
| Retnlb                        | 2.2371805 | up | UC | UC |

|                        |           |      |    |    |
|------------------------|-----------|------|----|----|
| Tmem26                 | 2.23638   | up   | UC | UC |
| Tnc                    | 2.2218065 | up   | UC | UC |
| Il33                   | 2.1951447 | up   | UC | UC |
| Col6a2                 | 2.1719327 | up   | UC | UC |
| Egr2                   | 2.1453521 | up   | UC | UC |
| Cxcl5                  | 2.1441832 | up   | UC | UC |
| Pim1                   | 2.13918   | up   | UC | UC |
| Fcrls                  | 2.1056838 | up   | UC | UC |
| A430084P05Rik          | 2.101046  | up   | UC | UC |
| Dnahc8                 | 2.0998173 | up   | UC | UC |
| Ccdc80                 | 2.096303  | up   | UC | UC |
| Capn9                  | 2.0894635 | up   | UC | UC |
| Rab3il1                | 2.0840602 | up   | UC | UC |
| Atp10b                 | 2.0802333 | up   | UC | UC |
| Atp6v0a4 D630045J12Rik | 2.0799565 | up   | UC | UC |
| Cd83                   | 2.0775678 | up   | UC | UC |
| Serpina3c              | 2.0674734 | up   | UC | UC |
| Gp49a                  | 2.0645196 | up   | UC | UC |
| Ms4a8a                 | 2.0526438 | up   | UC | UC |
| Ptafr                  | 2.046893  | up   | UC | UC |
| Rnf19b                 | 2.0314064 | up   | UC | UC |
| Sdf2l1                 | 2.004928  | up   | UC | UC |
| Kcnn4                  | 2.0005116 | up   | UC | UC |
| Pon1                   | 7.098839  | down | UC | UC |
| Fmo3                   | 4.2391853 | down | UC | UC |
| Fpr1                   | 4.120274  | down | UC | UC |
| Sult1d1                | 3.7674947 | down | UC | UC |
| Car3                   | 3.0287263 | down | UC | UC |
| Acox1                  | 2.9486182 | down | UC | UC |
| Cst8                   | 2.7494392 | down | UC | UC |
| Cyp4a12b               | 2.6737537 | down | UC | UC |
| Ear1                   | 2.5779445 | down | UC | UC |
| Cidec                  | 2.3859582 | down | UC | UC |
| Lyz1                   | 2.3574667 | down | UC | UC |
| Col12a1                | 2.2283916 | down | UC | UC |
| Tnni3                  | 2.1275725 | down | UC | UC |
| Myl4                   | 2.1020784 | down | UC | UC |

|               |           |      |    |    |
|---------------|-----------|------|----|----|
| Igfbp3        | 2.0820405 | down | UC | UC |
| Cyp2a4 Cyp2a5 | 2.0414095 | down | UC | UC |

**Transcript list 7** (UC-unchanged) - Differentially expressed genes following IL-4 administration (WT specific transcripts)

| Gene symbol       | Wild type   |           | <i>Il13ra1</i> <sup>-/-</sup> |           |
|-------------------|-------------|-----------|-------------------------------|-----------|
|                   | Fold change | Direction | Fold change                   | Direction |
| Chi3l4            | 6.19        | up        | UC                            | UC        |
| Orm1              | 5.23        | up        | UC                            | UC        |
| Pdcd1lg2          | 4.78        | up        | UC                            | UC        |
| Irg1              | 4.15        | up        | UC                            | UC        |
| Tm4sf19           | 3.81        | up        | UC                            | UC        |
| Tnfrsf9           | 3.76        | up        | UC                            | UC        |
| H2-M2             | 3.62        | up        | UC                            | UC        |
| Slc7a11           | 3.54        | up        | UC                            | UC        |
| Niacr1            | 3.48        | up        | UC                            | UC        |
| Cxcl10            | 3.25        | up        | UC                            | UC        |
| Clca3             | 3.15        | up        | UC                            | UC        |
| Cxcl9             | 3.03        | up        | UC                            | UC        |
| Msr1              | 2.93        | up        | UC                            | UC        |
| Kynu              | 2.92        | up        | UC                            | UC        |
| Ptafr             | 2.84        | up        | UC                            | UC        |
| Ankrd55           | 2.81        | up        | UC                            | UC        |
| Muc5ac            | 2.78        | up        | UC                            | UC        |
| Il1rn             | 2.76        | up        | UC                            | UC        |
| Cldn1             | 2.73        | up        | UC                            | UC        |
| Cfp               | 2.70        | up        | UC                            | UC        |
| A430084P05<br>Rik | 2.63        | up        | UC                            | UC        |
| Orm2              | 2.63        | up        | UC                            | UC        |
| Slfn4             | 2.50        | up        | UC                            | UC        |
| Inhba             | 2.48        | up        | UC                            | UC        |
| Ccr1              | 2.47        | up        | UC                            | UC        |
| Mmp19             | 2.46        | up        | UC                            | UC        |
| Clec7a            | 2.46        | up        | UC                            | UC        |
| Irf4              | 2.43        | up        | UC                            | UC        |

|            |      |    |    |    |
|------------|------|----|----|----|
| Cxcr2      | 2.37 | up | UC | UC |
| Il1r2      | 2.36 | up | UC | UC |
| Clec4a2    | 2.35 | up | UC | UC |
| Slc7a2     | 2.34 | up | UC | UC |
| C1qc       | 2.34 | up | UC | UC |
| Slamf8     | 2.34 | up | UC | UC |
| Prg4       | 2.33 | up | UC | UC |
| Hmox1      | 2.33 | up | UC | UC |
| C3ar1      | 2.29 | up | UC | UC |
| Ear5       | 2.28 | up | UC | UC |
| Egr2       | 2.28 | up | UC | UC |
| Kcnn4      | 2.28 | up | UC | UC |
| Fcer2a     | 2.25 | up | UC | UC |
| Cd163      | 2.24 | up | UC | UC |
| Cd83       | 2.22 | up | UC | UC |
| Rab3il1    | 2.21 | up | UC | UC |
| Tcfec      | 2.20 | up | UC | UC |
| Fcgr3      | 2.19 | up | UC | UC |
| Clec5a     | 2.19 | up | UC | UC |
| F7         | 2.18 | up | UC | UC |
| Tbxas1     | 2.18 | up | UC | UC |
| Ms4a8a     | 2.17 | up | UC | UC |
| Agr2       | 2.17 | up | UC | UC |
| Arg2 Vti1b | 2.17 | up | UC | UC |
| Trem2      | 2.14 | up | UC | UC |
| C1qb       | 2.14 | up | UC | UC |
| Slamf7     | 2.13 | up | UC | UC |
| Itgam      | 2.12 | up | UC | UC |
| Cd300lf    | 2.11 | up | UC | UC |
| Adam8      | 2.10 | up | UC | UC |
| Mt2        | 2.09 | up | UC | UC |
| Capg       | 2.09 | up | UC | UC |
| Ifi205     | 2.08 | up | UC | UC |
| Sdf2l1     | 2.08 | up | UC | UC |
| Noxo1      | 2.07 | up | UC | UC |
| Cd200r1    | 2.06 | up | UC | UC |
| Clec4a3    | 2.05 | up | UC | UC |



|          |      |      |    |    |
|----------|------|------|----|----|
| Vnn1     | 2.05 | up   | UC | UC |
| Slc39a14 | 2.04 | up   | UC | UC |
| C1qa     | 2.04 | up   | UC | UC |
| Cd80     | 2.02 | up   | UC | UC |
| Pon1     | 2.45 | down | UC | UC |
| Ppbp     | 2.17 | down | UC | UC |

**Transcript list 8** (UC-unchanged) - Differentially expressed genes following IL-4 administration (WT and *Il13ra1*<sup>-/-</sup> shared transcripts)

| Gene symbol         | Wild type   |           | <i>Il13ra1</i> <sup>-/-</sup> |           |
|---------------------|-------------|-----------|-------------------------------|-----------|
|                     | Fold change | Direction | Fold change                   | Direction |
| Ear11               | 60.38       | up        | 57.18                         | up        |
| Fbp1                | 29.91       | up        | 18.20                         | up        |
| Ccl24               | 17.59       | up        | 5.30                          | up        |
| AA467197 Mir147     | 11.86       | up        | 5.82                          | up        |
| Mmp12               | 11.64       | up        | 11.49                         | up        |
| Saa3                | 11.44       | up        | 9.81                          | up        |
| Ccl3                | 7.36        | up        | 4.62                          | up        |
| Ccl8                | 7.31        | up        | 6.76                          | up        |
| Arg1                | 7.08        | up        | 2.68                          | up        |
| Ccl17               | 6.90        | up        | 6.33                          | up        |
| Ly6i                | 6.71        | up        | 5.83                          | up        |
| Timp1               | 6.30        | up        | 3.60                          | up        |
| 4833422F24Rik       | 6.21        | up        | 2.94                          | up        |
| Tarm1               | 6.15        | up        | 2.06                          | up        |
| Slc26a4             | 5.72        | up        | 2.28                          | up        |
| Ccl2                | 5.48        | up        | 2.82                          | up        |
| Ccl7                | 5.28        | up        | 2.31                          | up        |
| Cd209d              | 5.16        | up        | 4.18                          | up        |
| Ccl9                | 4.85        | up        | 4.30                          | up        |
| Gatm                | 4.83        | up        | 2.95                          | up        |
| Cxcl2               | 4.45        | up        | 2.00                          | up        |
| Tnip3               | 4.44        | up        | 2.86                          | up        |
| Olf111              | 4.25        | up        | 2.89                          | up        |
| Ctsk                | 4.18        | up        | 3.40                          | up        |
| Mgl2                | 4.06        | up        | 5.19                          | up        |
| Ch25h               | 4.05        | up        | 3.28                          | up        |
| F10                 | 3.74        | up        | 2.63                          | up        |
| Rgs1                | 3.64        | up        | 2.05                          | up        |
| Ccl22               | 3.60        | up        | 2.53                          | up        |
| Cd209e              | 3.59        | up        | 2.76                          | up        |
| Serpina3f Serpina3g | 3.44        | up        | 3.08                          | up        |
| Il1a                | 3.39        | up        | 2.80                          | up        |

|                          |      |      |      |      |
|--------------------------|------|------|------|------|
| Ms4a6d                   | 3.21 | up   | 2.29 | up   |
| Chi3l3                   | 3.09 | up   | 3.41 | up   |
| Plau                     | 2.91 | up   | 2.74 | up   |
| Snord118                 | 2.87 | up   | 2.84 | up   |
| Itgax                    | 2.72 | up   | 2.31 | up   |
| Ccr5 Ccr2                | 2.60 | up   | 2.14 | up   |
| Alox15                   | 2.52 | up   | 3.08 | up   |
| Fcgr2b                   | 2.51 | up   | 2.10 | up   |
| Il1b                     | 2.46 | up   | 2.20 | up   |
| Selp                     | 2.42 | up   | 2.39 | up   |
| Gm11428                  | 2.37 | up   | 2.64 | up   |
| Gp49a                    | 2.34 | up   | 2.06 | up   |
| Clec10a                  | 2.23 | up   | 2.20 | up   |
| Steap4                   | 2.20 | up   | 2.13 | up   |
| Retnla                   | 2.07 | up   | 3.84 | up   |
| Folr2                    | 2.12 | up   | 2.16 | up   |
| Cxcl13                   | 2.30 | up   | 2.53 | down |
| LOC672291                | 2.60 | up   | 2.73 | down |
| Fpr1                     | 4.48 | down | 3.27 | down |
| Ear1                     | 2.40 | down | 3.53 | down |
| Cst8                     | 2.13 | down | 2.16 | down |
| Car3                     | 2.12 | down | 2.50 | down |
| IghmAC38.205.12 AI324046 | 2.07 | down | 2.16 | down |

**Transcript list 9** (UC-unchanged) - Differentially expressed genes following IL-4 administration (*Il13ra1*<sup>-/-</sup> specific transcripts)

| Gene symbol                                   | Wild type   |           | <i>Il13ra1</i> <sup>-/-</sup> |           |
|-----------------------------------------------|-------------|-----------|-------------------------------|-----------|
|                                               | Fold change | Direction | Fold change                   | Direction |
| Fcrls                                         | UC          | UC        | 2.39                          | up        |
| Gzma                                          | UC          | UC        | 2.19                          | up        |
| Lcn2                                          | UC          | UC        | 2.17                          | up        |
| Myl7                                          | UC          | UC        | 3.74                          | down      |
| Ucp1                                          | UC          | UC        | 3.16                          | down      |
| Cox8b                                         | UC          | UC        | 2.90                          | down      |
| Tnni3                                         | UC          | UC        | 2.88                          | down      |
| Myl4                                          | UC          | UC        | 2.77                          | down      |
| LOC672291 Igk-J1                              | UC          | UC        | 2.58                          | down      |
| Gm1419 Igkv4-71 Gm1524 Igk-C Gm10880          | UC          | UC        | 2.45                          | down      |
| Glycam1                                       | UC          | UC        | 2.37                          | down      |
| A1324046 IghmAC3 8.205.12 LOC634541 LOC634206 | UC          | UC        | 2.34                          | down      |
| Gm10880                                       | UC          | UC        | 2.33                          | down      |
| Gpd1                                          | UC          | UC        | 2.31                          | down      |
| Tnnt2                                         | UC          | UC        | 2.26                          | down      |
| Igkv4-71 Gm8760 Gm1499                        | UC          | UC        | 2.21                          | down      |
| Igk-V1                                        | UC          | UC        | 2.17                          | down      |
| Mb                                            | UC          | UC        | 2.15                          | down      |
| Igj                                           | UC          | UC        | 2.13                          | down      |
| Nppa                                          | UC          | UC        | 2.12                          | down      |
| Pla2g2d                                       | UC          | UC        | 2.07                          | down      |
| Fabp3                                         | UC          | UC        | 2.06                          | down      |
| Gm1502 Gm8760 Igkv4-71                        | UC          | UC        | 2.03                          | down      |
| Thrsp                                         | UC          | UC        | 2.02                          | down      |

**Transcript list 10** (UC-unchanged) – IL-13 and bleomycin induced Type 2 IL-4R independent transcripts

| Gene symbol         | Wild type   |           |             |           |             |           |
|---------------------|-------------|-----------|-------------|-----------|-------------|-----------|
|                     | BLM         |           | IL-4        |           | IL-13       |           |
|                     | Fold change | Direction | Fold change | Direction | Fold change | Direction |
| Igfbp3              | 5.7x4       | down      | UC          | UC        | 2.08        | down      |
| Ear1                | 2.13        | down      | 2.40        | down      | 2.58        | down      |
| Acox1               | 2.69        | down      | UC          | UC        | 2.95        | down      |
| Cst8                | 3.29        | down      | 2.13        | down      | 2.75        | down      |
| Cyp4a12b            | 2.72        | down      | UC          | UC        | 2.67        | down      |
| Sult1d1             | 2.37        | down      | UC          | UC        | 3.77        | down      |
| Pon1                | 2.20        | down      | 2.45        | down      | 7.10        | down      |
| Pigr                | 2.81        | down      | UC          | UC        | 2.77        | up        |
| Selp                | 2.22        | up        | 2.42        | up        | 3.53        | up        |
| Fcgr2b              | 2.93        | up        | 2.51        | up        | 2.37        | up        |
| Gp49a               | 3.03        | up        | 2.34        | up        | 2.06        | up        |
| Egr2                | 2.57        | up        | 2.28        | up        | 2.15        | up        |
| Igf1                | 2.18        | up        | UC          | UC        | 2.29        | up        |
| Arg1                | 2.28        | up        | 7.08        | up        | 8.11        | up        |
| Ccl2                | 4.68        | up        | 5.48        | up        | 3.67        | up        |
| Ccl7                | 4.00        | up        | 5.28        | up        | 4.19        | up        |
| Ccl8                | 2.43        | up        | 7.31        | up        | 3.28        | up        |
| Ccl9                | 3.33        | up        | 4.85        | up        | 4.21        | up        |
| Ccl3                | 3.84        | up        | 7.36        | up        | 5.90        | up        |
| Serpina3f Serpina3g | 2.48        | up        | 3.44        | up        | 6.76        | up        |
| Serpina3n           | 2.64        | up        | UC          | UC        | 2.31        | up        |
| Inhba               | 2.51        | up        | 2.48        | up        | 2.47        | up        |
| Plau                | 3.22        | up        | 2.91        | up        | 2.64        | up        |
| Tgm1                | 2.78        | up        | UC          | UC        | 2.40        | up        |
| Tm4sf19             | 2.85        | up        | 3.81        | up        | 3.50        | up        |
| Rab3il1             | 2.11        | up        | 2.21        | up        | 2.08        | up        |
| Ms4a6d              | 3.90        | up        | 3.21        | up        | 3.31        | up        |
| Ch25h               | 3.19        | up        | 4.05        | up        | 4.53        | up        |
| Il1rn               | 2.36        | up        | 2.76        | up        | 2.36        | up        |
| AA467197 Mir147     | 3.75        | up        | 11.86       | up        | 9.68        | up        |

|                         |                              |           |             |           |             |           |
|-------------------------|------------------------------|-----------|-------------|-----------|-------------|-----------|
| Gatm                    | 2.91                         | up        | 4.83        | up        | 4.95        | up        |
| Sprr2a1 Sprr2a2 Sprr2a3 | 2.33                         | up        | UC          | UC        | 13.40       | up        |
| Slc7a11                 | 2.15                         | up        | 3.54        | up        | 3.43        | up        |
| Fcrls                   | 3.06                         | up        | UC          | UC        | 2.11        | up        |
| Ptafr                   | 2.07                         | up        | 2.84        | up        | 2.05        | up        |
| Tnc                     | 7.37                         | up        | UC          | UC        | 2.22        | up        |
| Tnip3                   | 5.43                         | up        | 4.44        | up        | 5.48        | up        |
| Bhlhe40                 | 2.43                         | up        | UC          | UC        | 2.27        | up        |
| Saa3                    | 4.68                         | up        | 11.44       | up        | 4.41        | up        |
| Ccl17                   | 3.07                         | up        | 6.90        | up        | 6.07        | up        |
| Mmp12                   | 7.21                         | up        | 11.64       | up        | 10.61       | up        |
| Ccr5 Ccr2               | 3.88                         | up        | 2.60        | up        | 2.28        | up        |
| Ccr5 Ccr2               | 3.88                         | up        | 2.60        | up        | 2.28        | up        |
| Tarm1                   | 2.27                         | up        | 6.15        | up        | 5.75        | up        |
| Timp1                   | 7.49                         | up        | 6.30        | up        | 5.52        | up        |
| Gene symbol             | <i>Il13ra1<sup>-/-</sup></i> |           |             |           |             |           |
|                         | BLM                          |           | IL-4        |           | IL-13       |           |
|                         | Fold change                  | Direction | Fold change | Direction | Fold change | Direction |
| Igfbp3                  | 4.09                         | down      | UC          | UC        | UC          | UC        |
| Ear1                    | 2.55                         | down      | 3.530384    | down      | UC          | UC        |
| Acox1                   | 6.13                         | down      | UC          | UC        | UC          | UC        |
| Cst8                    | 3.31                         | down      | 2.1630516   | down      | UC          | UC        |
| Cyp4a12b                | 2.2                          | down      | UC          | UC        | UC          | UC        |
| Sult1d1                 | 2.42                         | down      | UC          | UC        | UC          | UC        |
| Pon1                    | 3.57                         | down      | UC          | UC        | UC          | UC        |
| Pigr                    | 2.01                         | down      | UC          | UC        | UC          | UC        |
| Selp                    | 4.27                         | up        | 2.3948743   | up        | UC          | UC        |
| Fcgr2b                  | 3.6                          | up        | 2.0991619   | up        | UC          | UC        |
| Gp49a                   | 6.22                         | up        | 2.064882    | up        | UC          | UC        |
| Egr2                    | 2.91                         | up        | UC          | UC        | UC          | UC        |
| Igf1                    | 3.19                         | up        | UC          | UC        | UC          | UC        |
| Arg1                    | 7.09                         | up        | 2.6750345   | up        | UC          | UC        |
| Ccl2                    | 15.14                        | up        | 2.8175962   | up        | UC          | UC        |
| Ccl7                    | 12.43                        | up        | 2.3058674   | up        | UC          | UC        |
| Ccl8                    | 3.96                         | up        | 6.7615666   | up        | UC          | UC        |
| Ccl9                    | 7.27                         | up        | 4.298718    | up        | UC          | UC        |

|                         |       |    |           |    |    |    |
|-------------------------|-------|----|-----------|----|----|----|
| Ccl3                    | 7.27  | up | 4.623901  | up | UC | UC |
| Serpina3f Serpina3g     | 3.15  | up | 3.078109  | up | UC | UC |
| Serpina3n               | 2.93  | up | UC        | UC | UC | UC |
| Inhba                   | 3.84  | up | UC        | UC | UC | UC |
| Plau                    | 4.66  | up | 2.735942  | up | UC | UC |
| Tgm1                    | 2.71  | up | UC        | UC | UC | UC |
| Tm4sf19                 | 3.5   | up | UC        | UC | UC | UC |
| Rab3il1                 | 2.81  | up | UC        | UC | UC | UC |
| Ms4a6d                  | 8.05  | up | 2.289672  | up | UC | UC |
| Ch25h                   | 5.16  | up | 3.2766106 | up | UC | UC |
| Il1rn                   | 4.57  | up | UC        | UC | UC | UC |
| AA467197 Mir147         | 6.99  | up | 5.8197117 | up | UC | UC |
| Gatm                    | 4.71  | up | 2.9521654 | up | UC | UC |
| Sprr2a1 Sprr2a2 Sprr2a3 | 2.11  | up | UC        | UC | UC | UC |
| Slc7a11                 | 3.52  | up | UC        | UC | UC | UC |
| Fcrls                   | 3.32  | up | 2.3925862 | up | UC | UC |
| Ptafr                   | 4.99  | up | UC        | UC | UC | UC |
| Tnc                     | 9.10  | up | UC        | UC | UC | UC |
| Tnip3                   | 5.62  | up | 2.8603406 | up | UC | UC |
| Bhlhe40                 | 2.59  | up | UC        | UC | UC | UC |
| Saa3                    | 13.46 | up | 9.809541  | up | UC | UC |
| Ccl17                   | 3.06  | up | 6.3296576 | up | UC | UC |
| Mmp12                   | 11.52 | up | 11.49343  | up | UC | UC |
| Ccr5 Ccr2               | 7.15  | up | 2.1442137 | up | UC | UC |
| Ccr5 Ccr2               | 7.15  | up | 2.1442137 | up | UC | UC |
| Tarm1                   | 3.40  | up | 2.0578372 | up | UC | UC |
| Timp1                   | 13.00 | up | 3.6003463 | up | UC | UC |

**Transcript list 11**– IL-4 and bleomycin induced Type 2 IL-4R independent transcripts

| Gene symbol         | Wild type   |           |             |           |             |           |
|---------------------|-------------|-----------|-------------|-----------|-------------|-----------|
|                     | BLM         |           | IL-4        |           | IL-13       |           |
|                     | Fold change | Direction | Fold change | Direction | Fold change | Direction |
| Ear1                | 2.13        | down      | 2.40        | down      | 2.58        | down      |
| Cst8                | 3.29        | down      | 2.13        | down      | 2.75        | down      |
| Ppbbp               | 2.75        | down      | 2.17        | down      | UC          | UC        |
| Pon1                | 2.20        | down      | 2.45        | down      | 7.10        | down      |
| Selp                | 2.22        | up        | 2.42        | up        | 3.53        | up        |
| Fcgr2b              | 2.93        | up        | 2.51        | up        | 2.37        | up        |
| Fcgr3               | 2.56        | up        | 2.19        | up        | UC          | UC        |
| Ifi205              | 2.40        | up        | 2.08        | up        | UC          | UC        |
| Gp49a               | 3.03        | up        | 2.34        | up        | 2.06        | up        |
| Egr2                | 2.57        | up        | 2.28        | up        | 2.15        | up        |
| Mmp19               | 2.34        | up        | 2.46        | up        | UC          | UC        |
| Arg1                | 2.28        | up        | 7.08        | up        | 8.11        | up        |
| Ccl2                | 4.68        | up        | 5.48        | up        | 3.67        | up        |
| Ccl7                | 4.00        | up        | 5.28        | up        | 4.19        | up        |
| Ccl8                | 2.43        | up        | 7.31        | up        | 3.28        | up        |
| Gm11428             | 3.05        | up        | 2.37        | up        | UC          | UC        |
| Ccl9                | 3.33        | up        | 4.85        | up        | 4.21        | up        |
| Ccl3                | 3.84        | up        | 7.36        | up        | 5.90        | up        |
| Serpina3f Serpina3g | 2.48        | up        | 3.44        | up        | 6.76        | up        |
| Inhba               | 2.51        | up        | 2.48        | up        | 2.47        | up        |
| Plau                | 3.22        | up        | 2.91        | up        | 2.64        | up        |
| Slc39a14            | 2.95        | up        | 2.04        | up        | UC          | UC        |
| Tm4sf19             | 2.85        | up        | 3.81        | up        | 3.50        | up        |
| Cd80                | 2.49        | up        | 2.02        | up        | UC          | UC        |
| Trem2               | 3.90        | up        | 2.14        | up        | UC          | UC        |
| Rab3il1             | 2.11        | up        | 2.21        | up        | 2.08        | up        |
| Ms4a6d              | 3.90        | up        | 3.21        | up        | 3.31        | up        |
| Ch25h               | 3.19        | up        | 4.05        | up        | 4.53        | up        |
| Il1rn               | 2.36        | up        | 2.76        | up        | 2.36        | up        |
| AA467197 Mir147     | 3.75        | up        | 11.86       | up        | 9.68        | up        |
| Gatm                | 2.91        | up        | 4.83        | up        | 4.95        | up        |



|             |                              |           |             |           |             |           |
|-------------|------------------------------|-----------|-------------|-----------|-------------|-----------|
| Slc7a11     | 2.15                         | up        | 3.54        | up        | 3.43        | up        |
| Orm1        | 2.41                         | up        | 5.23        | up        | UC          | UC        |
| Ptafr       | 2.07                         | up        | 2.84        | up        | 2.05        | up        |
| C1qb        | 3.47                         | up        | 2.14        | up        | UC          | UC        |
| C1qc        | 3.94                         | up        | 2.34        | up        | UC          | UC        |
| C1qa        | 3.31                         | up        | 2.04        | up        | UC          | UC        |
| Cxcl13      | 4.66                         | up        | 2.30        | up        | UC          | UC        |
| Cxcl9       | 2.87                         | up        | 3.03        | up        | UC          | UC        |
| Cxcl10      | 3.85                         | up        | 3.25        | up        | UC          | UC        |
| Tnip3       | 5.43                         | up        | 4.44        | up        | 5.48        | up        |
| Capg        | 2.06                         | up        | 2.09        | up        | UC          | UC        |
| Clec4a2     | 2.02                         | up        | 2.35        | up        | UC          | UC        |
| Clec5a      | 3.21                         | up        | 2.19        | up        | UC          | UC        |
| C3ar1       | 5.89                         | up        | 2.29        | up        | UC          | UC        |
| Itgam       | 2.48                         | up        | 2.12        | up        | UC          | UC        |
| Saa3        | 4.68                         | up        | 11.44       | up        | 4.41        | up        |
| Mt2         | 2.43                         | up        | 2.09        | up        | UC          | UC        |
| Ccl17       | 3.07                         | up        | 6.90        | up        | 6.07        | up        |
| Msr1        | 4.94                         | up        | 2.93        | up        | UC          | UC        |
| Mmp12       | 7.21                         | up        | 11.64       | up        | 10.61       | up        |
| Ccr5 Ccr2   | 3.88                         | up        | 2.60        | up        | 2.28        | up        |
| Ccr1        | 2.47                         | up        | 2.47        | up        | UC          | UC        |
| Ccr5 Ccr2   | 3.88                         | up        | 2.60        | up        | 2.28        | up        |
| Tarm1       | 2.27                         | up        | 6.15        | up        | 5.75        | up        |
| Timp1       | 7.49                         | up        | 6.30        | up        | 5.52        | up        |
| Gene symbol | <i>Il13ra1<sup>-/-</sup></i> |           |             |           |             |           |
|             | BLM                          |           | IL-4        |           | IL-13       |           |
|             | Fold change                  | Direction | Fold change | Direction | Fold change | Direction |
| Ear1        | 2.56                         | down      | 3.530384    | down      | UC          | UC        |
| Cst8        | 3.31                         | down      | 2.1630516   | down      | UC          | UC        |
| Ppbbp       | 2.87                         | down      | UC          | UC        | UC          | UC        |
| Pon1        | 3.57                         | down      | UC          | UC        | UC          | UC        |
| Selp        | 4.27                         | up        | 2.3948743   | up        | UC          | UC        |
| Fcgr2b      | 3.6                          | up        | 2.0991619   | up        | UC          | UC        |
| Fcgr3       | 3.35                         | up        | UC          | UC        | UC          | UC        |

|                     |        |    |               |      |    |    |
|---------------------|--------|----|---------------|------|----|----|
| Ifi205              | 3.64   | up | UC            | UC   | UC | UC |
| Gp49a               | 6.22   | up | 2.06488<br>2  | up   | UC | UC |
| Egr2                | 2.91   | up | UC            | UC   | UC | UC |
| Mmp19               | 3.5    | up | UC            | UC   | UC | UC |
| Arg1                | 7.09   | up | 2.67503<br>45 | up   | UC | UC |
| Ccl2                | 15.14  | up | 2.81759<br>62 | up   | UC | UC |
| Ccl7                | 12.43  | up | 2.30586<br>74 | up   | UC | UC |
| Ccl8                | 3.96   | up | 6.76156<br>66 | up   | UC | UC |
| Gm11428             | 6.6    | up | 2.63632<br>6  | up   | UC | UC |
| Ccl9                | 7.27   | up | 4.29871<br>8  | up   | UC | UC |
| Ccl3                | 7.27   | up | 4.62390<br>1  | up   | UC | UC |
| Serpina3f Serpina3g | 3.15   | up | 3.07810<br>9  | up   | UC | UC |
| Inhba               | 3.84   | up | UC            | UC   | UC | UC |
| Plau                | 4.66   | up | 2.73594<br>2  | up   | UC | UC |
| Slc39a14            | 3.21   | up | UC            | UC   | UC | UC |
| Tm4sf19             | 3.55   | up | UC            | UC   | UC | UC |
| Cd80                | 3.45   | up | UC            | UC   | UC | UC |
| Trem2               | 4.71   | up | UC            | UC   | UC | UC |
| Rab3il1             | 2.81   | up | UC            | UC   | UC | UC |
| Ms4a6d              | 8.05   | up | 2.28967<br>2  | up   | UC | UC |
| Ch25h               | 5.16   | up | 3.27661<br>06 | up   | UC | UC |
| Il1rn               | 4.57   | up | UC            | UC   | UC | UC |
| AA467197 Mir147     | 6.99   | up | 5.81971<br>17 | up   | UC | UC |
| Gatm                | 4.71   | up | 2.95216<br>54 | up   | UC | UC |
| Slc7a11             | 3.52   | up | UC            | UC   | UC | UC |
| Orm1                | 2.06   | up | UC            | UC   | UC | UC |
| Ptafr               | 4.99   | up | UC            | UC   | UC | UC |
| C1qb                | 3.48   | up | UC            | UC   | UC | UC |
| C1qc                | 4.3    | up | UC            | UC   | UC | UC |
| C1qa                | 3.82   | up | UC            | UC   | UC | UC |
| Cxcl13              | 3.64   | up | 2.53070<br>83 | down | UC | UC |
| Cxcl9               | 4.88   | up | UC            | UC   | UC | UC |
| Cxcl10              | 11.346 | up | UC            | UC   | UC | UC |

|           |       |    |               |    |    |    |
|-----------|-------|----|---------------|----|----|----|
| Tnip3     | 5.62  | up | 2.86034<br>06 | up | UC | UC |
| Capg      | 2.76  | up | UC            | UC | UC | UC |
| Clec4a2   | 3.03  | up | UC            | UC | UC | UC |
| Clec5a    | 5.00  | up | UC            | UC | UC | UC |
| C3ar1     | 12.93 | up | UC            | UC | UC | UC |
| Itgam     | 6.15  | up | UC            | UC | UC | UC |
| Saa3      | 13.46 | up | 9.80954<br>1  | up | UC | UC |
| Mt2       | 2.28  | up | UC            | UC | UC | UC |
| Ccl17     | 3.06  | up | 6.32965<br>76 | up | UC | UC |
| Msr1      | 9.02  | up | UC            | UC | UC | UC |
| Mmp12     | 11.52 | up | 11.4934<br>3  | up | UC | UC |
| Ccr5 Ccr2 | 7.15  | up | 2.14421<br>37 | up | UC | UC |
| Ccr1      | 4.45  | up | UC            | UC | UC | UC |
| Ccr5 Ccr2 | 7.15  | up | 2.14421<br>37 | up | UC | UC |
| Tarm1     | 3.40  | up | 2.05783<br>72 | up | UC | UC |
| Timp1     | 13.00 | up | 3.60034<br>63 | up | UC | UC |
